# Supplementary material for: Genome-wide mapping of N4-methylcytosine at single-base resolution by APOBEC3A-mediated deamination sequencing
Source: Royal Society of Chemistry journal article supplement (doi:10.1039/d2sc02446b), 2022-01-01
Supplement: d2sc02446b1.pdf [file d2sc02446b1.pdf]

## Supplementary Information

for

### Genome-wide mapping of *N*<sup>4</sup>-methylcytosine at single-base resolution by APOBEC3A-mediated deamination sequencing

Jun Xiong,<sup>1,2,3</sup> † Ping Wang,<sup>4,5</sup> † Wen-Xuan Shao,<sup>1,2</sup> Gaojie Li,<sup>4,5</sup> Jiang-Hui Ding,<sup>1,2</sup> Neng-Bin Xie,<sup>1,2</sup> Min Wang,<sup>1,2</sup> Qing-Yun Cheng,<sup>1</sup> Conghua Xie,<sup>1,3</sup> Weimin Ci,<sup>4,5\*</sup> Bi-Feng Yuan,<sup>1,2,3,6\*</sup> Yu-Qi Feng<sup>1,2</sup>

<sup>1</sup> Department of Radiation and Medical Oncology, Zhongnan Hospital of Wuhan University, School of Public Health, Wuhan University, Wuhan 430071, China.

<sup>2</sup> Sauvage Center for Molecular Sciences, Department of Chemistry, Wuhan University, Wuhan 430072, China.

<sup>3</sup> Cancer Precision Diagnosis and Treatment and Translational Medicine Hubei Engineering Research Center, Zhongnan Hospital of Wuhan University, Wuhan, China.

<sup>4</sup> Key Laboratory of Genomics and Precision Medicine, and China National Center for Bioinformatics, Beijing Institute of Genomics, Chinese Academy of Sciences, Beijing 100101, China.

<sup>5</sup> University of Chinese Academy of Sciences, Beijing 100049, China.

<sup>6</sup> Wuhan Research Center for Infectious Diseases and Cancer, Chinese Academy of Medical Sciences.

† These authors contributed equally to this work.

\* Corresponding author:

Bi-Feng Yuan. E-mail: bfyuan@whu.edu.cn

Weimin Ci. E-mail: ciwm@big.ac.cn

## This file contains:

---

|              |                                                                                                                                                                                                                                                                                                                                                                                                                                                                                                                           |
|--------------|---------------------------------------------------------------------------------------------------------------------------------------------------------------------------------------------------------------------------------------------------------------------------------------------------------------------------------------------------------------------------------------------------------------------------------------------------------------------------------------------------------------------------|
| Pages S3- S5 | Synthesis of 3-methyl-2'-deoxycytidine (3mdC).<br>Expression and purification of recombinant A3A protein.<br>Enzymatic digestion of DNA.<br>Confirmation of 4mC modification in <i>D. radiodurans</i> DNA by tandem mass spectrometry analysis and high-resolution mass spectrometry analysis.<br>Analysis of 4mC in specific loci by 4mC-AMD-seq in <i>D. radiodurans</i> DNA.<br>Distribution of 4mC in gene body and upstream and downstream of genes.<br>Analysis of the methylation level distribution of 4mC sites. |
| Page S6      | Table S1. The sequences of 215 bp dsDNA substrates.                                                                                                                                                                                                                                                                                                                                                                                                                                                                       |
| Page S7      | Table S2. The mass spectrometry parameters for the analysis of nucleosides.                                                                                                                                                                                                                                                                                                                                                                                                                                               |
| Page S8      | Table S3. Conditions used to for steady-state kinetics study.                                                                                                                                                                                                                                                                                                                                                                                                                                                             |
| Page S9      | Table S4. Oligonucleotides for library construction for the 4mC-AMD-seq.                                                                                                                                                                                                                                                                                                                                                                                                                                                  |
| Page S10     | Table S5. Statistical data from 4mC-AMD-seq for <i>D. radiodurans</i> .                                                                                                                                                                                                                                                                                                                                                                                                                                                   |
| Page S11     | Table S6. Overall 4mC level in <i>D. radiodurans</i> DNA by 4mC-AMD-seq.                                                                                                                                                                                                                                                                                                                                                                                                                                                  |
| Page S12     | Table S7. Primers for locus-specific amplification of regions that contain C(4mC)GCGG motif detected by 4mC-AMD-seq in <i>D. radiodurans</i> .                                                                                                                                                                                                                                                                                                                                                                            |
| Page S13     | Figure S1. SDS-PAGE analysis of the purified A3A protein.                                                                                                                                                                                                                                                                                                                                                                                                                                                                 |
| Page S14     | Figure S2. Preparation of 215 bp dsDNA substrates.                                                                                                                                                                                                                                                                                                                                                                                                                                                                        |
| Page S15     | Figure S3. Colony sequencing using DNA-C without A3A treatment.                                                                                                                                                                                                                                                                                                                                                                                                                                                           |
| Page S16     | Figure S4. Colony sequencing using DNA-C with A3A treatment.                                                                                                                                                                                                                                                                                                                                                                                                                                                              |
| Page S17     | Figure S5. Colony sequencing using DNA-5mC without A3A treatment.                                                                                                                                                                                                                                                                                                                                                                                                                                                         |
| Page S18     | Figure S6. Colony sequencing using DNA-5mC with A3A treatment.                                                                                                                                                                                                                                                                                                                                                                                                                                                            |
| Page S19     | Figure S7. Colony sequencing using DNA-4mC without A3A treatment.                                                                                                                                                                                                                                                                                                                                                                                                                                                         |
| Page S20     | Figure S8. Colony sequencing using DNA-4mC with A3A treatment.                                                                                                                                                                                                                                                                                                                                                                                                                                                            |
| Page S21     | Figure S9. Raw data for detection of D <sub>3</sub> -4mdC from <i>D. radiodurans</i> DNA with LC-MS/MS analysis.                                                                                                                                                                                                                                                                                                                                                                                                          |
| Page S22     | Figure S10. Determination of 4mC in <i>D. radiodurans</i> DNA by LC-MS/MS.                                                                                                                                                                                                                                                                                                                                                                                                                                                |
| Page S23     | Figure S11. Confirmation of 4mC modification in <i>D. radiodurans</i> DNA by high-resolution mass spectrometry.                                                                                                                                                                                                                                                                                                                                                                                                           |
| Page S24     | Figure S12. The proposed fragmentation pathways of 4mdC and 5mdC.                                                                                                                                                                                                                                                                                                                                                                                                                                                         |
| Page S25     | Figure S13. Determination of DNA cytosine methylation in <i>D. radiodurans</i> DNA by LC-MS/MS.                                                                                                                                                                                                                                                                                                                                                                                                                           |
| Page S26     | Figure S14. Determination of 5hmC, 5fC, and 5caC in <i>D. radiodurans</i> DNA by LC-MS/MS.                                                                                                                                                                                                                                                                                                                                                                                                                                |
| Page S27     | Figure S15. Growth curve of <i>D. radiodurans</i> .                                                                                                                                                                                                                                                                                                                                                                                                                                                                       |
| Page S28     | Figure S16. Schematic illustration of the library construction for 4mC-AMD-seq.                                                                                                                                                                                                                                                                                                                                                                                                                                           |
| Page S29     | Figure S17. Correlation of methylation level of the identified 4mC sites in different replicates.                                                                                                                                                                                                                                                                                                                                                                                                                         |
| Page S30     | Figure S18. Distribution of 4mC sites in the different regions of genes.                                                                                                                                                                                                                                                                                                                                                                                                                                                  |
| Page S31     | Figure S19. Distribution of the methylation level of 4mC site in C(4mC)GCGG motif in different replicates.                                                                                                                                                                                                                                                                                                                                                                                                                |
| Page S32     | Figure S20. Locus-specific analysis of 4mC in seven C(4mC)GCGG motif by Sanger sequencing.                                                                                                                                                                                                                                                                                                                                                                                                                                |
| Page S33     | References.                                                                                                                                                                                                                                                                                                                                                                                                                                                                                                               |

---

## Supplementary Methods

### Synthesis of 3-methyl-2'-deoxycytidine (3mdC)

3-Methyl-2'-deoxycytidine (3mdC) was synthesized according to the previous study with slight modifications.<sup>1</sup> Briefly, 1 mg of 2'-deoxycytidine in 400  $\mu$ L of NaAc–HAc buffer (pH 4.3) was reacted with 100  $\mu$ L of dimethyl sulfate at 37°C for 1 h. The 3mdC product was separated and purified by HPLC, and confirmed by high-resolution mass spectrometry analysis.

### Expression and purification of recombinant A3A protein

The plasmid for A3A protein expression (pET-41a-A3A) was purchased from TsingKe Co., Ltd. pET-41a-A3A plasmid contains the full-length coding sequence of A3A in the pET-41a vector, which carries the glutathione S-transferase (GST) tag and the human rhinovirus 3C protease (HRV 3C) site. A3A protein was expressed and purified according to the previously described procedure with slight modification.<sup>2</sup> Briefly, the pET-41a-A3A plasmid was transformed into *E. coli* BL21 (DE3) competent cells. Protein expression in liquid culture was induced by the addition of 0.5 mM isopropyl- $\beta$ -D-thiogalactoside (IPTG, Sangon) when the cell density reached an optical density at 600 nm of 0.4–0.7. The cells were grown for 15 h at 16°C in LB medium containing 100  $\mu$ g/mL kanamycin (Sangon). Then the cells were pelleted and lysed by sonication in PBS buffer with 2 mM dithiothreitol and 50  $\mu$ g/mL phenylmethylsulfonyl fluoride. Cellular debris was separated by centrifugation and filtered with a 0.22  $\mu$ m membrane. The recombinant A3A protein was purified using glutathione sepharose 4B (GE Healthcare) following the manufacturer's protocol. After digestion with HRV 3C protease (Sangon), the protein was further purified with a size-exclusion column (Millipore, Darmstadt, Germany) equilibrated with a storage solution containing 20 mM Tris-HCl (pH 8.0), 150 mM NaCl, 40% glycerol, 0.01 mM EDTA, 0.5 mM dithiothreitol, and 0.01% Tween-20, and stored at –80°C freezer before use. The purity A3A protein was confirmed by SDS-polyacrylamide gel electrophoresis (Figure S1).

### Enzymatic digestion of DNA

A3A protein-treated or untreated DNA (in 25  $\mu$ L of H<sub>2</sub>O) was digested in the solution with

360 U of S1 nuclease, 4 U of DNase I, 0.002 U of venom phosphodiesterase I, 30 U of alkaline phosphatase, and 3  $\mu$ L of enzymatic buffer (500 mM Tris-HCl, 100 mM NaCl, 10 mM MgCl<sub>2</sub>, 10 mM ZnSO<sub>4</sub>, pH 7.0). The mixture (30  $\mu$ L) was incubated at 37°C for 3 h. After adding 270  $\mu$ L H<sub>2</sub>O, the resulting solution was extracted with chloroform twice. The resulting aqueous layer was collected and lyophilized to dryness and then reconstituted in water followed by analysis with LC-MS/MS. For the analysis of 4mC modification, 1  $\mu$ g of *D. radiodurans* genome DNA was digested to nucleosides.

### **Confirmation of 4mC modification in *D. radiodurans* DNA by tandem mass spectrometry analysis and high-resolution mass spectrometry analysis**

To unambiguously determine the existence of 4mC or/and 5mC in *D. radiodurans* DNA, we first explored the MS fragmentation behavior of 4mC and 5mC standards. The results showed that both 4mC and 5mC produced the ion  $m/z$  126 under collision energy of 10 V (Figure S10). With higher collision energy of 40 V, the fragment ions of 4mC and 5mC were similar, but 4mC produced a characteristic ion at  $m/z$  95 (Figure S10). After digestion into nucleosides, *D. radiodurans* DNA was analyzed by LC-MS/MS and the similar fragment ions to 4mC standard were observed, including the characteristic ion ( $m/z$  95) (Figure S10).

We also applied high-resolution mass spectrometry to evaluate the fragmentation patterns of 4mC and 5mC. The results verified that a characteristic ion at  $m/z$  95.0238 was produced only by 4mC standard and *D. radiodurans* DNA (Figure S11). We proposed that 4mC lose a ribose to form the fragment ion of  $m/z$  126.0662, which can further lose a methylamino group on N4 position to form the fragment ion of  $m/z$  95.0240 (Figure S12).

3-Methylcytosine (3mC), a damaged base in genomic DNA, possesses a similar fragmentation pattern to that of 4mC, including the characteristic ion of  $m/z$  95. We optimized the separation conditions and 3mC was clearly separated with 4mC and 5mC. The LC-MS/MS analysis showed that 3mC was absent in *D. radiodurans* DNA (Figure S13).

### **Analysis of 4mC in specific loci by 4mC-AMD-seq in *D. radiodurans* DNA**

100 ng of *D. radiodurans* DNA was denatured and treated with A3A protein (6  $\mu$ M) in a final concentration of 20 mM MES (pH 6.5), 0.1% Triton X-100, and 10% DMSO at 37°C for

2 h. The deamination reaction was terminated by incubating the solution at 95°C for 10 min. Selected loci were amplified by PCR using EpiMark® Hot Start Taq DNA polymerase (New England Biolabs). The PCR products were purified and subjected to Sanger sequencing (TsingKe).

### **Distribution of 4mC in gene body and upstream and downstream of genes**

The 100 bp upstream and downstream regions of genes were divided into 30 bins, and the gene body was divided into 60 bins. The average methylation level of each bin was calculated as follows:

$$\text{Methylation level} = \frac{\sum_{i=1}^n N_{Ci}}{\sum_{i=1}^n (N_{Ci} + N_{Ti})} \times 100\%$$

$N_{Ci}$  refers to the number of “C” bases that are counted as 4mC sites.  $N_{Ti}$  refers to the number of “T” bases that are counted as unmethylated C sites.

### **Analysis of the methylation level distribution of 4mC sites**

The sequence of 12 bp upstream and downstream of each 4mC site was extracted to obtain a 25 bp length motif. The ratio of 4mC/C in each motif was calculated based on the number of unmethylated C and methylated C in the motif. The numbers of various methylation levels were calculated based on the value counts of Pandas. Finally, the percentage of methylated C proportion was calculated.

**Table S1.** The sequences of primers and PCR amplified dsDNA.

| DNA                                                     | Sequence (5' to 3')                                                                                                                                                                                                                                                                                                                                                                                                                                                                                                                                                                                                                                                                                                                                                                                                                                                                                                                                                                                                                                        |
|---------------------------------------------------------|------------------------------------------------------------------------------------------------------------------------------------------------------------------------------------------------------------------------------------------------------------------------------------------------------------------------------------------------------------------------------------------------------------------------------------------------------------------------------------------------------------------------------------------------------------------------------------------------------------------------------------------------------------------------------------------------------------------------------------------------------------------------------------------------------------------------------------------------------------------------------------------------------------------------------------------------------------------------------------------------------------------------------------------------------------|
| <b>Primers</b>                                          |                                                                                                                                                                                                                                                                                                                                                                                                                                                                                                                                                                                                                                                                                                                                                                                                                                                                                                                                                                                                                                                            |
| Primers for DNA-C, DNA-4mC, DNA-5mC, and 4mC spike-in   | Original & A3A<br>Forward: GAGTGAGTGAGGGAGGAAG<br>Reverse: CCACTCACAAATTCACACAACATAC                                                                                                                                                                                                                                                                                                                                                                                                                                                                                                                                                                                                                                                                                                                                                                                                                                                                                                                                                                       |
| Primers for 5mC spike-in                                | Original<br>Forward: TTCTGACAACGATGGGAGGA<br>Reverse: CAAC TTTATCCCCCTCCATC                                                                                                                                                                                                                                                                                                                                                                                                                                                                                                                                                                                                                                                                                                                                                                                                                                                                                                                                                                                |
|                                                         | A3A deamination<br>Forward: ATAATGATTGGAGGATTGAAGGAGT<br>Reverse: CCACCTCCATCCAATCTATTAAT                                                                                                                                                                                                                                                                                                                                                                                                                                                                                                                                                                                                                                                                                                                                                                                                                                                                                                                                                                  |
| Primers for C spike-in                                  | Original<br>Forward: TGCTGATAAATCTGGAGCCG<br>Reverse: GAACGAAAACCTCACGTTAAGGG                                                                                                                                                                                                                                                                                                                                                                                                                                                                                                                                                                                                                                                                                                                                                                                                                                                                                                                                                                              |
|                                                         | A3A deamination<br>Forward: AGTGGGGAGAGATGGTAAG<br>Reverse: TCTTACCTACATCCTTTTAAATT                                                                                                                                                                                                                                                                                                                                                                                                                                                                                                                                                                                                                                                                                                                                                                                                                                                                                                                                                                        |
| <b>215 bp DNA substrates for the method development</b> |                                                                                                                                                                                                                                                                                                                                                                                                                                                                                                                                                                                                                                                                                                                                                                                                                                                                                                                                                                                                                                                            |
| DNA-C                                                   | GAGTGAGTGAGGGAGGAAGCGGAAGAGCGCCAATACGCAAACCGCCT<br>CTCCCCGCGCGTTGGCCGATTCATTAATGCAGCTGGCAGCAGAGTTTCC<br>CGACTGGAAAGCGGGCAGTGAGCGCAACGCAATTAATGTGAGTTAGCTC<br>ACTCATTAGCACCCAGGCTTTACACTTTATGCTTCCGGCTCGTATGTTGT<br>GTGGAATTGTGAGTGG                                                                                                                                                                                                                                                                                                                                                                                                                                                                                                                                                                                                                                                                                                                                                                                                                        |
| DNA-4mC                                                 | GAGTGAGTGAGGGAGGAAG <sup>4m</sup> CGGAAGAG <sup>4m</sup> CG <sup>4m</sup> C <sup>4m</sup> C <sup>4m</sup> CAATA <sup>4m</sup> CG <sup>4m</sup> CA<br>AA <sup>4m</sup> C <sup>4m</sup> CG <sup>4m</sup> C <sup>4m</sup> CT <sup>4m</sup> CT <sup>4m</sup> C <sup>4m</sup> C <sup>4m</sup> CG <sup>4m</sup> CG <sup>4m</sup> CGTTGG <sup>4m</sup> C <sup>4m</sup> CGATT <sup>4m</sup> CATTA<br>ATG <sup>4m</sup> CAG <sup>4m</sup> CTGG <sup>4m</sup> CA <sup>4m</sup> CGA <sup>4m</sup> CAGGTTT <sup>4m</sup> C <sup>4m</sup> C <sup>4m</sup> CGA <sup>4m</sup> CTGGAAAG <sup>4m</sup> CG<br>GG <sup>4m</sup> CAGTGAG <sup>4m</sup> CG <sup>4m</sup> CAA <sup>4m</sup> CG <sup>4m</sup> CAATTAATGTGAGTTAG <sup>4m</sup> CT <sup>4m</sup> CA <sup>4m</sup> CT<br><sup>4m</sup> CATTAGG <sup>4m</sup> CA <sup>4m</sup> C <sup>4m</sup> C <sup>4m</sup> C <sup>4m</sup> CAGG <sup>4m</sup> CTTTA <sup>4m</sup> CA <sup>4m</sup> CTTTATG <sup>4m</sup> CTT <sup>4m</sup> C <sup>4m</sup> CGG<br><sup>4m</sup> CT <sup>4m</sup> CGTATGTTGTGTGGAATTGTGAGTGG       |
| DNA-5mC                                                 | GAGTGAGTGAGGGAGGAAG <sup>5m</sup> CGGAAGAG <sup>5m</sup> CG <sup>5m</sup> C <sup>5m</sup> C <sup>5m</sup> CAATA <sup>5m</sup> CG <sup>5m</sup> CA<br>AA <sup>5m</sup> C <sup>5m</sup> CG <sup>5m</sup> C <sup>5m</sup> CT <sup>5m</sup> CT <sup>5m</sup> C <sup>5m</sup> C <sup>5m</sup> CG <sup>5m</sup> CG <sup>5m</sup> CGTTGG <sup>5m</sup> C <sup>5m</sup> CGATT <sup>5m</sup> CATTA<br>ATG <sup>5m</sup> CAG <sup>5m</sup> CTGG <sup>5m</sup> CA <sup>5m</sup> CGA <sup>5m</sup> CAGGTTT <sup>5m</sup> C <sup>5m</sup> C <sup>5m</sup> CGA <sup>5m</sup> CTGGAAAG <sup>5m</sup> CG<br>GG <sup>5m</sup> CAGTGAG <sup>5m</sup> CG <sup>5m</sup> CAA <sup>5m</sup> CG <sup>5m</sup> CAATTAATGTGAGTTAG <sup>5m</sup> CT <sup>5m</sup> CA <sup>5m</sup> CT<br><sup>5m</sup> CATTAGG <sup>5m</sup> CA <sup>5m</sup> C <sup>5m</sup> C <sup>5m</sup> C <sup>5m</sup> CAGG <sup>5m</sup> CTTTA <sup>5m</sup> CA <sup>5m</sup> CTTTATG <sup>5m</sup> CTT <sup>5m</sup> C <sup>5m</sup> CGG<br><sup>5m</sup> CT <sup>5m</sup> CGTATGTTGTGTGGAATTGTGAGTGG       |
| <b>Spike-in DNA for Illumina sequencing</b>             |                                                                                                                                                                                                                                                                                                                                                                                                                                                                                                                                                                                                                                                                                                                                                                                                                                                                                                                                                                                                                                                            |
| C spike-in                                              | TGCTGATAAATCTGGAGCCGGTGAGCGTGGGTCTCGCGGTATCATTGCAG<br>CACTGGGGCCAGATGGTAAGCCCTCCCGTATCGTAGTTATCTACACGACG<br>GGGAGTCAGGCAACTATGGATGAACGAAATAGACAGATCGCTGAGATAG<br>GTGCCTCACTGATTAAGCATTGGTAACTGTCAGACCAAGTTTACTCATATAT<br>ACTTTAGATTGATTTAAAACTTCATTTTTAATTTAAAAGGATCTAGGTGAAG<br>ATCCTTTTTGATAATCTCATGACCAAAAATCCCCTTAACGTGAGTTTTCGTTC                                                                                                                                                                                                                                                                                                                                                                                                                                                                                                                                                                                                                                                                                                                     |
| 4mC spike-in                                            | GAGTGAGTGAGGGAGGAAG <sup>4m</sup> CGGAAGAG <sup>4m</sup> CG <sup>4m</sup> C <sup>4m</sup> C <sup>4m</sup> CAATA <sup>4m</sup> CG <sup>4m</sup> CA<br>AA <sup>4m</sup> C <sup>4m</sup> CG <sup>4m</sup> C <sup>4m</sup> CT <sup>4m</sup> CT <sup>4m</sup> C <sup>4m</sup> C <sup>4m</sup> CG <sup>4m</sup> CG <sup>4m</sup> CGTTGG <sup>4m</sup> C <sup>4m</sup> CGATT <sup>4m</sup> CATTA<br>ATG <sup>4m</sup> CAG <sup>4m</sup> CTGG <sup>4m</sup> CA <sup>4m</sup> CGA <sup>4m</sup> CAGGTTT <sup>4m</sup> C <sup>4m</sup> C <sup>4m</sup> CGA <sup>4m</sup> CTGGAAAG <sup>4m</sup> CG<br>GG <sup>4m</sup> CAGTGAG <sup>4m</sup> CG <sup>4m</sup> CAA <sup>4m</sup> CG <sup>4m</sup> CAATTAATGTGAGTTAG <sup>4m</sup> CT <sup>4m</sup> CA <sup>4m</sup> CT<br><sup>4m</sup> CATTAGG <sup>4m</sup> CA <sup>4m</sup> C <sup>4m</sup> C <sup>4m</sup> C <sup>4m</sup> CAGG <sup>4m</sup> CTTTA <sup>4m</sup> CA <sup>4m</sup> CTTTATG <sup>4m</sup> CTT <sup>4m</sup> C <sup>4m</sup> CGG<br><sup>4m</sup> CT <sup>4m</sup> CGTATGTTGTGTGGAATTGTGAGTGG       |
| 5mC spike-in                                            | TTCTGACAACGATCGGAGGA <sup>5m</sup> C <sup>5m</sup> CGAAGGAG <sup>5m</sup> CTAA <sup>5m</sup> C <sup>5m</sup> CG <sup>5m</sup> CTTTTTT<br>G <sup>5m</sup> CA <sup>5m</sup> CAA <sup>5m</sup> CATGGGGGAT <sup>5m</sup> CATGTAA <sup>5m</sup> CT <sup>5m</sup> CG <sup>5m</sup> C <sup>5m</sup> CTTGAT <sup>5m</sup> CGTTGG<br>GAA <sup>5m</sup> C <sup>5m</sup> CGGAG <sup>5m</sup> CTGAATGAAG <sup>5m</sup> C <sup>5m</sup> CATA <sup>5m</sup> C <sup>5m</sup> CAA <sup>5m</sup> CGA <sup>5m</sup> CGAG <sup>5m</sup> C<br>GTGA <sup>5m</sup> CA <sup>5m</sup> C <sup>5m</sup> CA <sup>5m</sup> CGATG <sup>5m</sup> C <sup>5m</sup> CTGTAG <sup>5m</sup> CAATGG <sup>5m</sup> CAA <sup>5m</sup> CAA <sup>5m</sup> CGTTG<br><sup>5m</sup> CG <sup>5m</sup> CAAA <sup>5m</sup> CTATTA <sup>5m</sup> CTGG <sup>5m</sup> CGAA <sup>5m</sup> CTA <sup>5m</sup> CTTA <sup>5m</sup> CT <sup>5m</sup> CTAG <sup>5m</sup> CTT <sup>5m</sup> C<br><sup>5m</sup> C <sup>5m</sup> CGG <sup>5m</sup> CAA <sup>5m</sup> CAATTAATAGA <sup>5m</sup> CTGGATGGAGGCGGATAAAGTTG |

**Table S2.** The mass spectrometry parameters for the analysis of nucleosides.

| Analytes             | Precursor ion | Product ion | Q1 Pre/V | CE / V | Q3 Pre / V |
|----------------------|---------------|-------------|----------|--------|------------|
| dG                   | 268.2         | 152.1       | 22       | 10     | 29         |
| dA                   | 252.2         | 136.1       | 20       | 15     | 20         |
| dC                   | 228.2         | 112.1       | 11       | 10     | 20         |
| T                    | 243.2         | 127.0       | 12       | 10     | 22         |
| 3mdC/4mdC/5mdC       | 242.2         | 126.1       | 20       | 11     | 24         |
| 4mdC                 | 242.2         | 95.1        | 19       | 39     | 17         |
| D <sub>3</sub> -4mdC | 245.2         | 129.1       | 20       | 11     | 24         |
| 5hmdC                | 258.1         | 142.1       | 11       | 9      | 23         |
| 5fdC                 | 256.2         | 140.2       | 10       | 9      | 27         |
| 5cadC                | 272.1         | 156.1       | 20       | 11     | 30         |

**Table S3.** Conditions used to for steady-state kinetics study. Enzyme concentrations and incubation time were chosen with < 20% substrates being converted to products.

| Substrate | [A3A] (nM) | Time (min) |
|-----------|------------|------------|
| DNA-C     | 2.4        | 5          |
| DNA-5mC   | 2.4        | 5          |
| DNA-4mC   | 240        | 30         |



**Table S4.** Oligonucleotides for library construction for the 4mC-AMD-seq.

| Oligonucleotides    | Sequence (5' to 3')                                                                  |
|---------------------|--------------------------------------------------------------------------------------|
| Adaptor-OH          | TGAGAGAGAGGAGAATATAAATATGACATCGAT                                                    |
| Adaptor-P           | *TCGATGTCATATTTATATTAGGAGGAGAGGA                                                     |
| pre-P5 primer       | ACACTCTTTCCCTACACGACGCTCTTCCGATCTGAG<br>AGAGAGGAGAATATAAATATGATATT                   |
| pre-P5 primer       | GTGACTGGAGTTCAGACGTGTGCTCTTCCGATCTCC<br>TCTCCTCCTAATATAAATATAACATCA                  |
| P5-universal primer | AATGATACGGCGACCACCGAGATCTACACTCTTTCC<br>CTACACGACGCTCTTCCGATC**T                     |
| P7-index primer     | CAAGCAGAAGACGGCATAACGAGAT <u>XXXXXXXXXX</u> GT<br>GACTGGAGTTCAGACGTGTGCTCTTCCGATC**T |

Note: \* 5'-phosphorylation. \*\* phosphorothioate. In the sequence of P7-index primer, "XXXXXXXXXX" refers to index sequence which is consistent with NEBNext Index Primers for Illumina (Catlog E6611A, NEB).

**Table S5.** Statistical data from 4mC-AMD-seq for *D. radiodurans*.

| Sample | Raw reads  | Mapping rate (%) | Coverage (%) | Sequencing depth | Identified number of 4mC sites |
|--------|------------|------------------|--------------|------------------|--------------------------------|
| Rep 1  | 28,540,290 | 63.1             | 99.2         | 604              | 2067                           |
| Rep 2  | 53,587,212 | 79.4             | 99.2         | 498              | 2148                           |
| Rep 3  | 49,126,578 | 74.6             | 99.4         | 747              | 2345                           |

**Table S6.** Overall 4mC level in *D. radiodurans* DNA by 4mC-AMD-seq. FP, false positive; FN, false negative.

| Sample | Spike-ins           |                     | <i>D. radiodurans</i>                |                                    |                                              |
|--------|---------------------|---------------------|--------------------------------------|------------------------------------|----------------------------------------------|
|        | False positive (FP) | False negative (FN) | Total N4-unmethylated C reads number | Total N4-methylated C reads number | Genomic methylation reads level <sup>a</sup> |
| Rep 1  | 0.19%               | 3.6%                | 921,946,965                          | 5,894,438                          | 0.33%                                        |
| Rep 2  | 0.09%               | 3.1%                | 630,321,544                          | 3,542,119                          | 0.41%                                        |
| Rep 3  | 0.19%               | 2.7%                | 1,684,156,094                        | 5,657,228                          | 0.18%                                        |

<sup>a</sup>The genomic methylation reads level was calculated as follows:

$$\text{Level (\%)} = \frac{\text{Number of total methylated reads} - (\text{Number of total unmethylated reads} \times \text{FP})}{\text{Number of total unmethylated reads}} \times 100\%$$

**Table S7.** Primers for locus-specific amplification of regions that contain C(4mC)GCGG motif detected by 4mC-AMD-seq in *D. radiodurans*.

| Position of C4mCGCGG    | Assay             | Sequence (5' to 3')                                            |
|-------------------------|-------------------|----------------------------------------------------------------|
| Chr1: 291 642 (-)       | 4mC-AMD-seq       | Fw TTATGATGTATTTGGTGAGGATGGG<br>Rv AACCCCTCAAACCACTTTACTACTCAC |
|                         | Original sequence | Fw ACCCTGTTCCAGCCCCACC<br>Rv CGAGCCGGACACGCTCAAT               |
| Chr1: 1 912 062 (-)     | 4mC-AMD-seq       | Fw GGGGTGTTGGGTGATTTTG<br>Rv CTCATCATTCACCAAACCACA             |
|                         | Original sequence | Fw GGTGAGGGGTCTTTTTTACGGC<br>Rv CAGTTTCCCATCGAGAACGAGG         |
| Chr2: 336 034 (+)       | 4mC-AMD-seq       | Fw GGGTGAGTAGTTATGGTATGGTG<br>Rv CTAAATCTACCCACCTCCATA         |
|                         | Original sequence | Fw CTGCAGTTCGCCAACTTCAGG<br>Rv CAGCGACATCATGTTGCTCAGC          |
| Chr2: 336 037 (-)       | 4mC-AMD-seq       | Fw TGAGTGTTGAAAGTTGGGTGT<br>Rv CACTCTACTCAACTCCAAAACCT         |
|                         | Original sequence | Fw CTGCAGTTCGCCAACTTCAGG<br>Rv CAGCGACATCATGTTGCTCAGC          |
| Plasmid MP1: 95 556 (-) | 4mC-AMD-seq       | Fw AGTTTGAAAATGTAGGGTTTGAGTG<br>Rv CACATCAAACATCATCTTATCACCC   |
| Plasmid MP1: 95 634 (-) | Original sequence | Fw CATCTGGTCGGCAACTATGTCA<br>Rv CGTCCTGTGTCCACTCGTCTTT         |
| Plasmid SP1: 8995 (+)   | 4mC-AMD-seq       | Fw TTTGGTTGAGGTGGATTGATG<br>Rv CACCCTCAATCATCACAACAACCT        |
|                         | Original sequence | Fw GGCAGTTCTGGAACACCCAG<br>Rv CGACGAGCAGGACTTCATGC             |

**Figure S1.** SDS-PAGE analysis of the purified A3A protein.

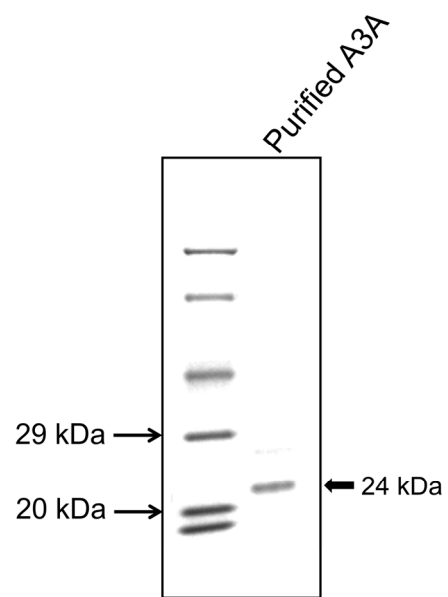

**Figure S2.** Preparation of 215-bp dsDNA substrates (DNA-C, DNA-4mC and DNA-5mC). (A) Sequence of the 215 bp DNA. (B) 0.5 ng of pUC19 vector DNA (Takara) was used as template for PCR amplification with using dATP/dGTP/dTTP and dCTP (or 5mdCTP, 4mdCTP). (C) Agarose gel electrophoresis analysis of PCR products.

**A** Forward primer

5'- GAGTGAGTGAGGGAGGAAGCGGAAGAGCGCCCAATACGCAAACCGCCTCT  
 3'- CTCACTCACTCCCTCCTTCGCCTTCTCGCGGGTTATGCGTTTGGCGGAGA

CCCCGCGCGTTGGCCGATTCATTAATGCAGCTGGCACGACAGGTTTCCCG  
 GGGGCGCGCAACCGGCTAAGTAATTACGTCGACCGTGCTGTCCAAAGGGC

ACTGGAAAGCGGGCAGTGAGCGCAACGCAATTAATGTGAGTTAGCTCACT  
 TGACCTTTCGCCCGTCACTCGCGTTGCGTTAATTACACTCAATCGAGTGA

CATTAGGCACCCCAGGCTTTACACTTTATGCTTCCGGCTCGTATGTTGTG  
 GTAATCCGTGGGGTCCGAAATGTGAAATACGAAGGCCGAGCATAACAACAC

TGGAATTGTGAGTGG -3'

ACCTTAACACTCACC -5'

Reverse primer

**B**

pUC19 DNA

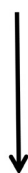

PCR with dATP, dGTP, TTP,  
 dCTP/5mdCTP/4mdCTP

215 bp DNA

**C**

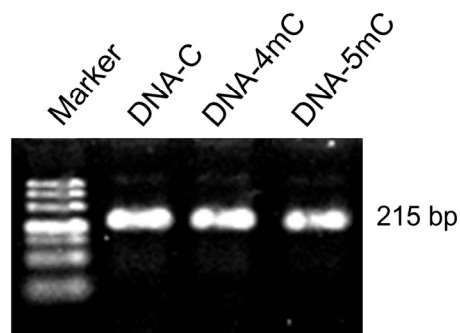

**Figure S3.** Colony sequencing using DNA-C without A3A treatment. Forty clones were picked for sequencing. All the 2120 cytosine sites (53 cytosines/strand  $\times$  40 clones = 2120 cytosines) in DNA-C were read as cytosine. Red, read as C.

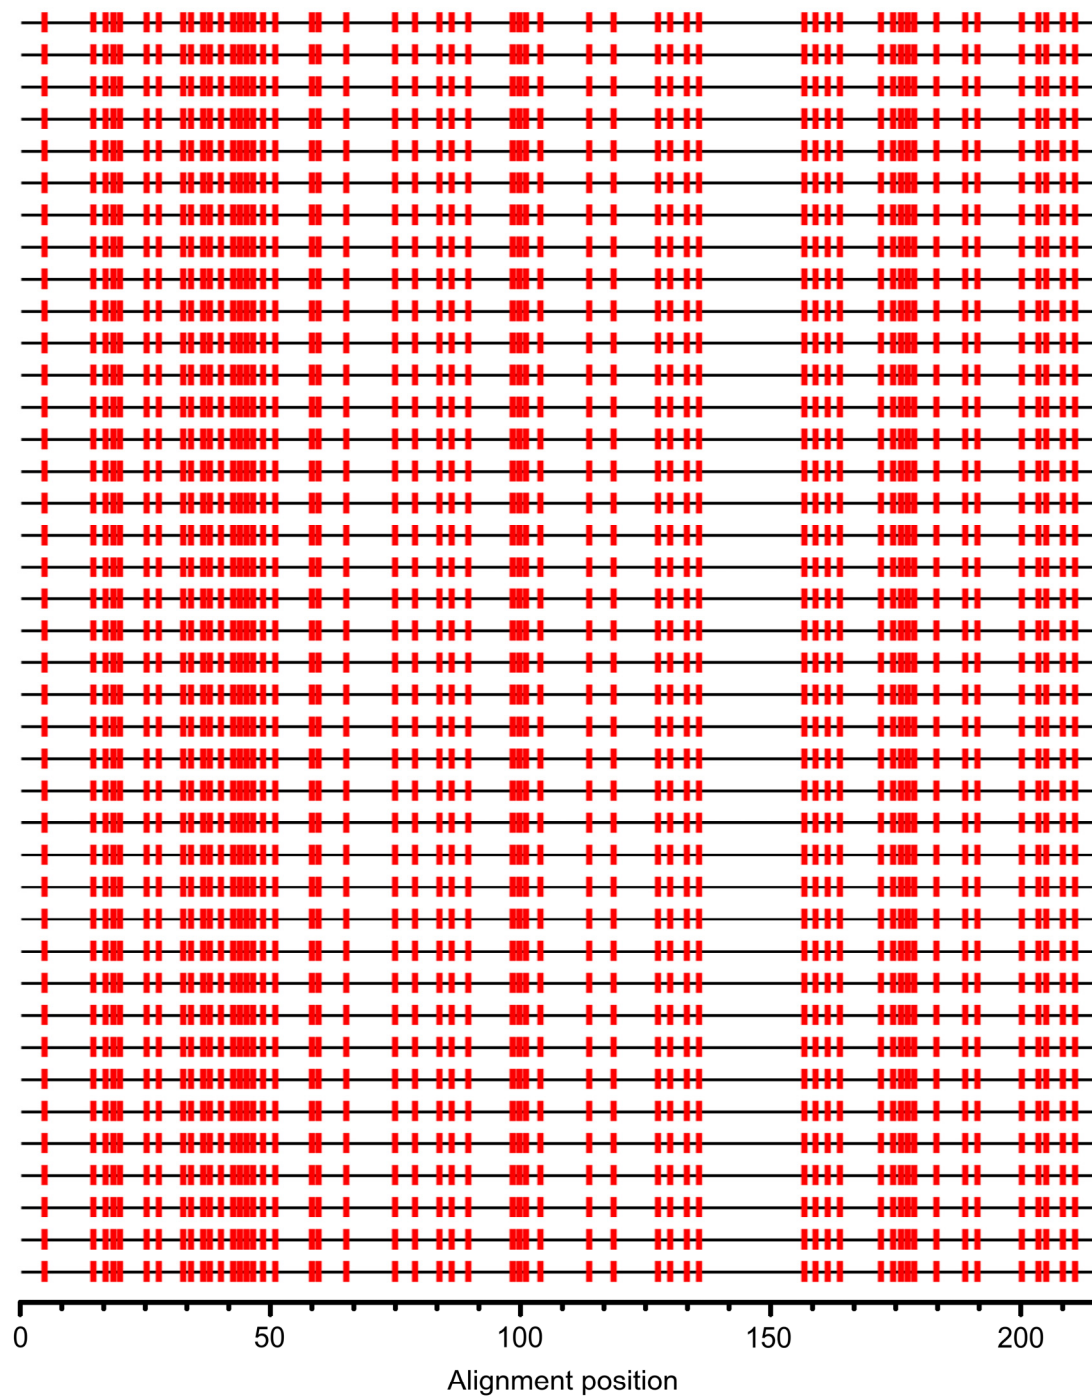

**Figure S4.** Colony sequencing using DNA-C with A3A treatment. Forty clones were picked for sequencing. All the 2120 cytosine sites (53 cytosines/strand  $\times$  40 clones = 2120 cytosines) in DNA-C were read as thymine, indicating that 100% cytosine sites were deaminated by A3A protein. Blue, read as T.

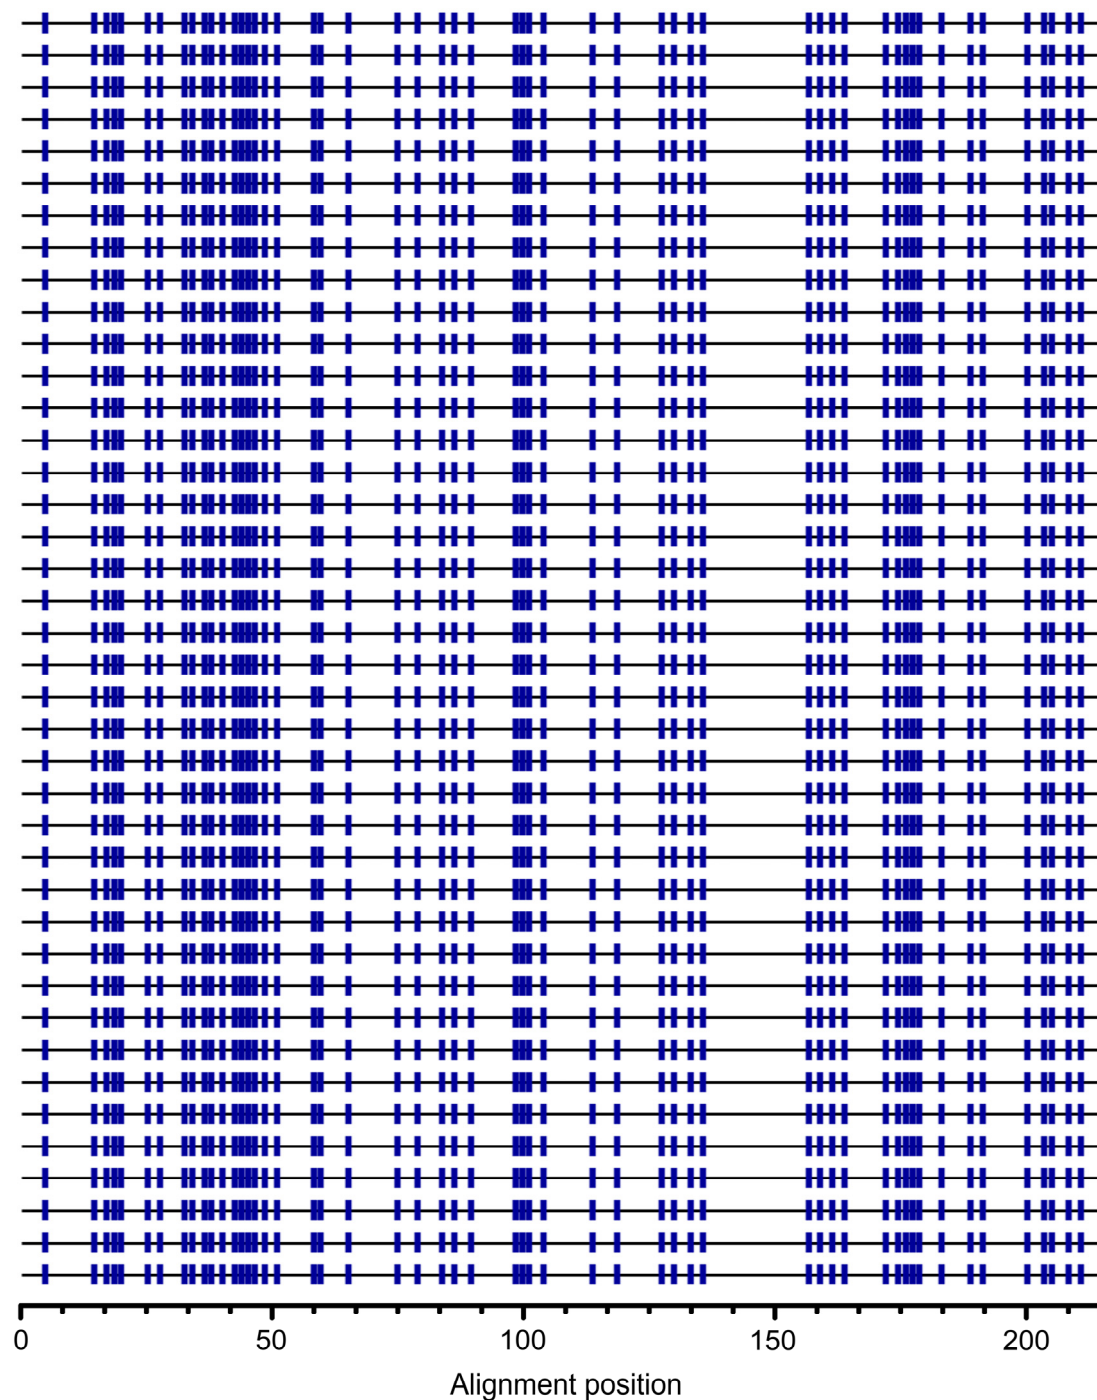



**Figure S5.** Colony sequencing using DNA-5mC without A3A treatment. Forty clones were picked for sequencing. 2119 5mC sites in DNA-5mC were read as cytosine. Red, read as C; blue, read as T.

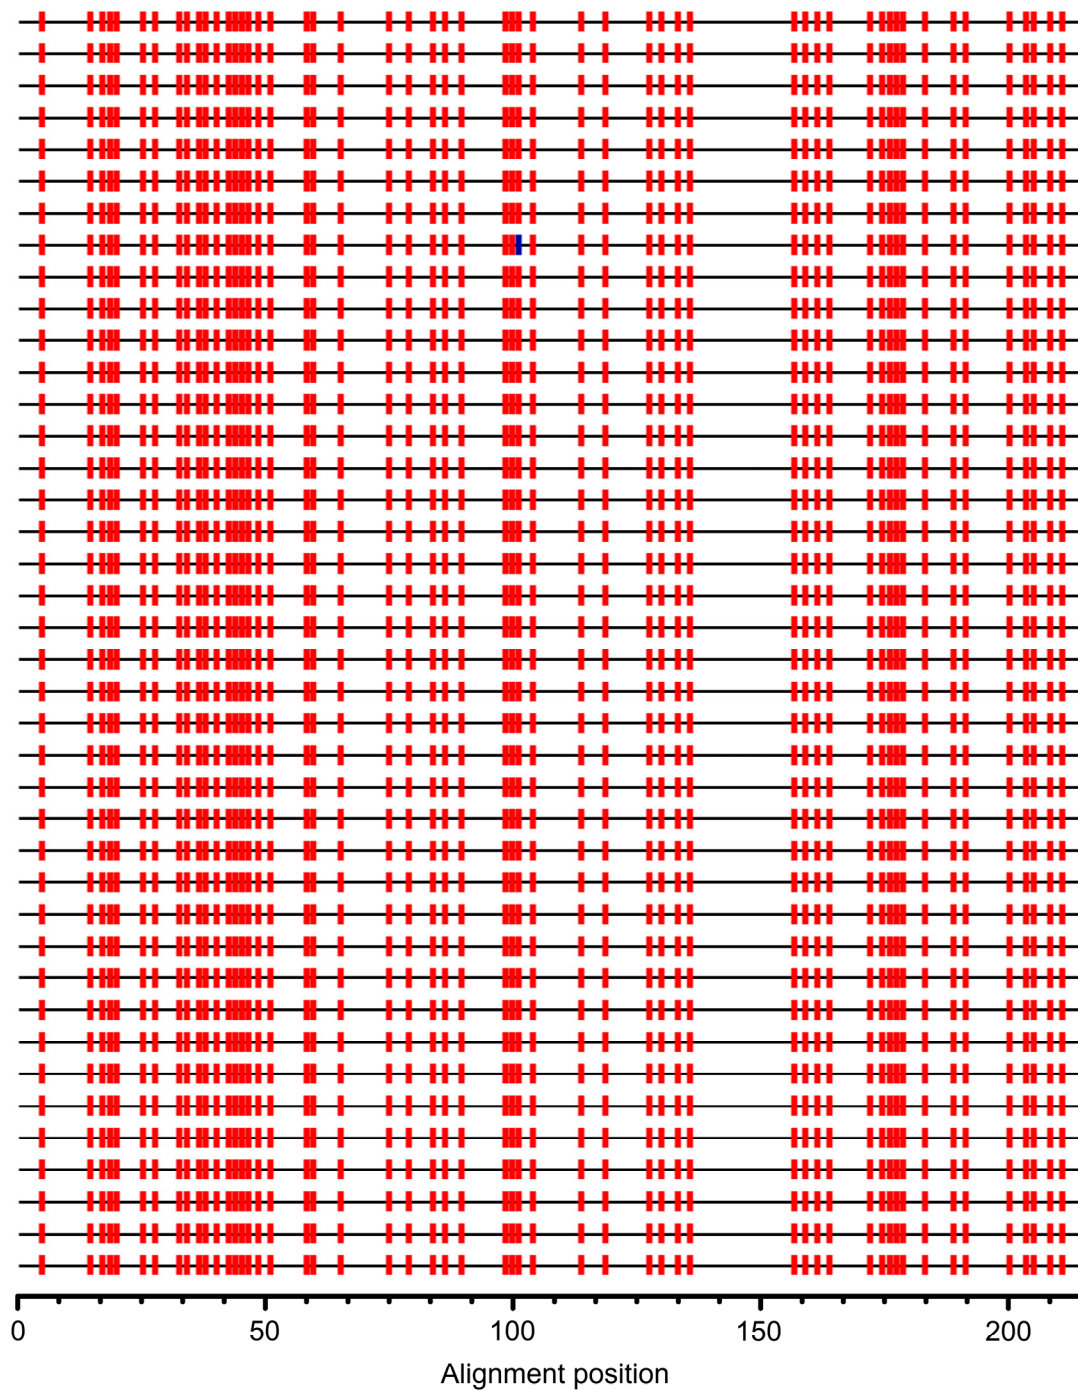

**Figure S6.** Colony sequencing using DNA-5mC with A3A treatment. Forty clones were picked for sequencing. Only 26 5mC sites in DNA-5mC (53 cytosines/strand  $\times$  40 clones = 2120 cytosines) were read as cytosine after A3A treatment, indicating that only 1.2% (26/2120 = 1.2%) residual 5mC sites were left after A3A treatment. Red, read as C; blue, read as T.

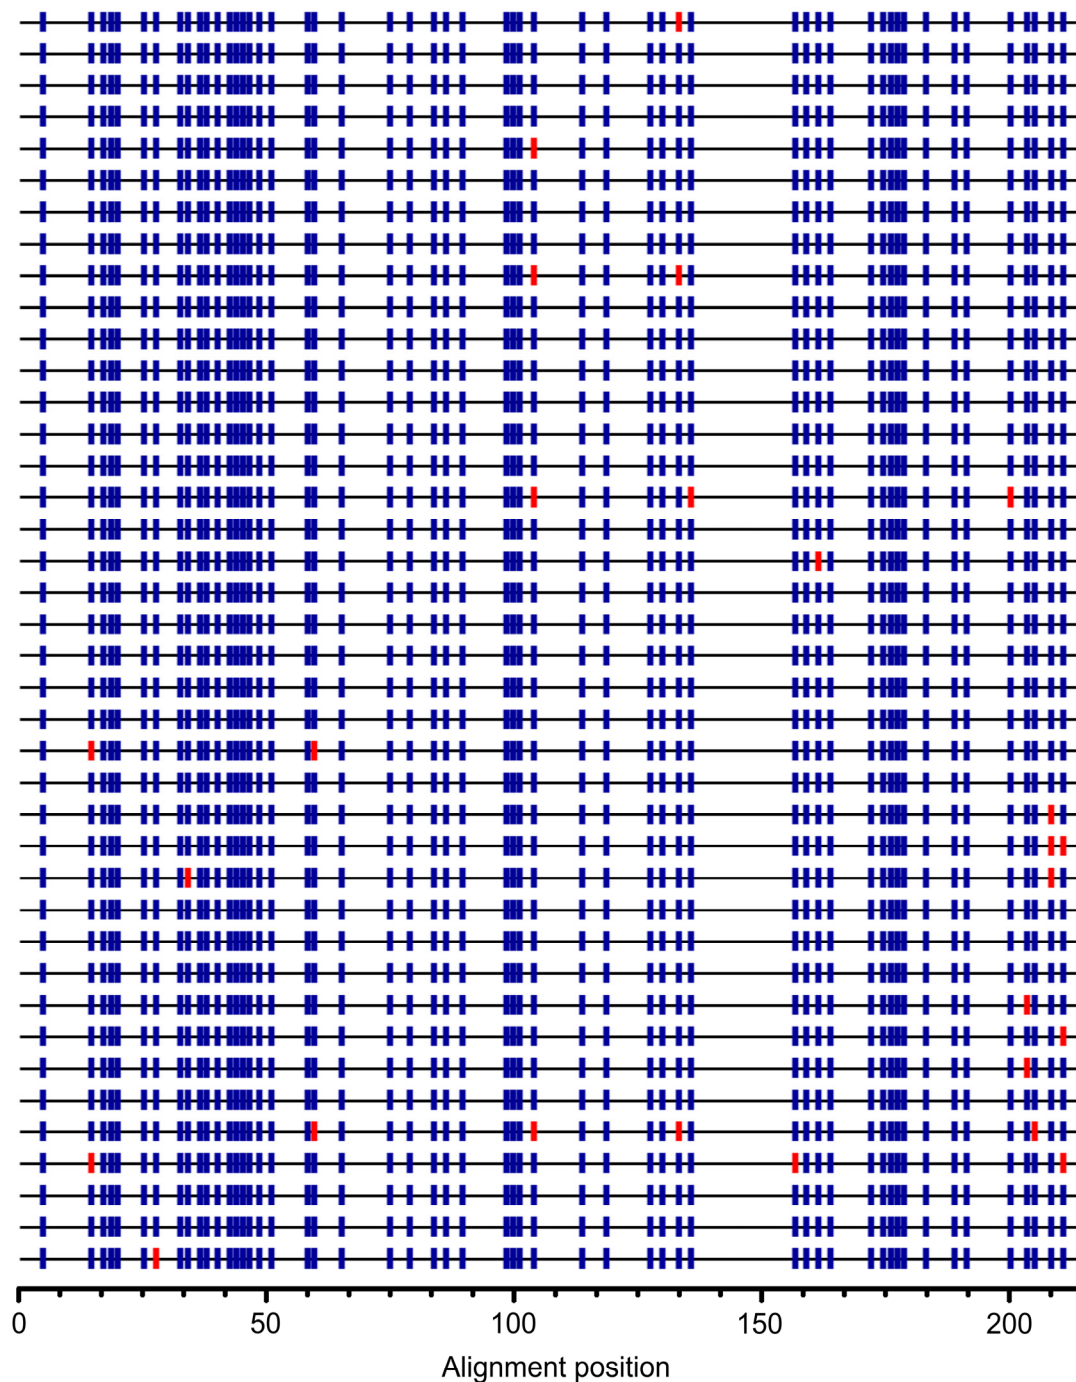

**Figure S7.** Colony sequencing using DNA-4mC without A3A treatment. Forty clones were picked for sequencing. All the 2120 4mC sites (53 cytosines/strand  $\times$  40 clones = 2120 cytosines) in DNA-4mC were read as cytosine. Red, read as C.

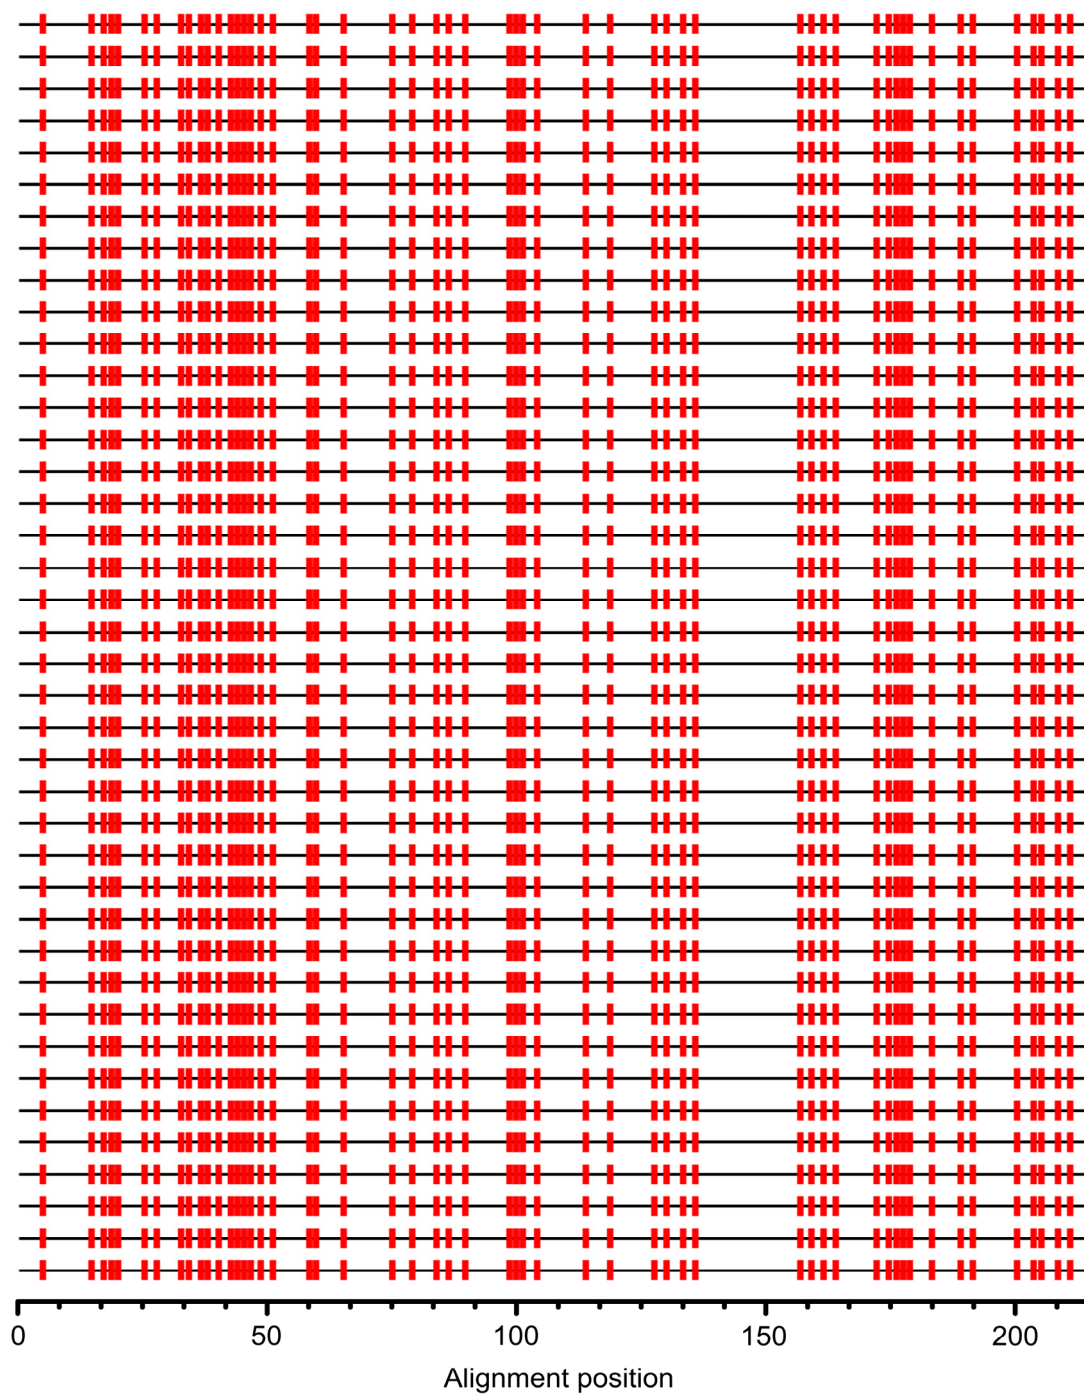

**Figure S8.** Colony sequencing using DNA-4mC with A3A treatment. Forty clones were picked for sequencing. 2056 4mC sites (53 cytosines/strand  $\times$  40 clones = 2120 cytosines) in DNA-4mC were read as cytosine, indicating that 97.0% (2056/2120 = 97.0%) 4mC sites were kept after by A3A treatment. Red, read as C; blue, read as T.

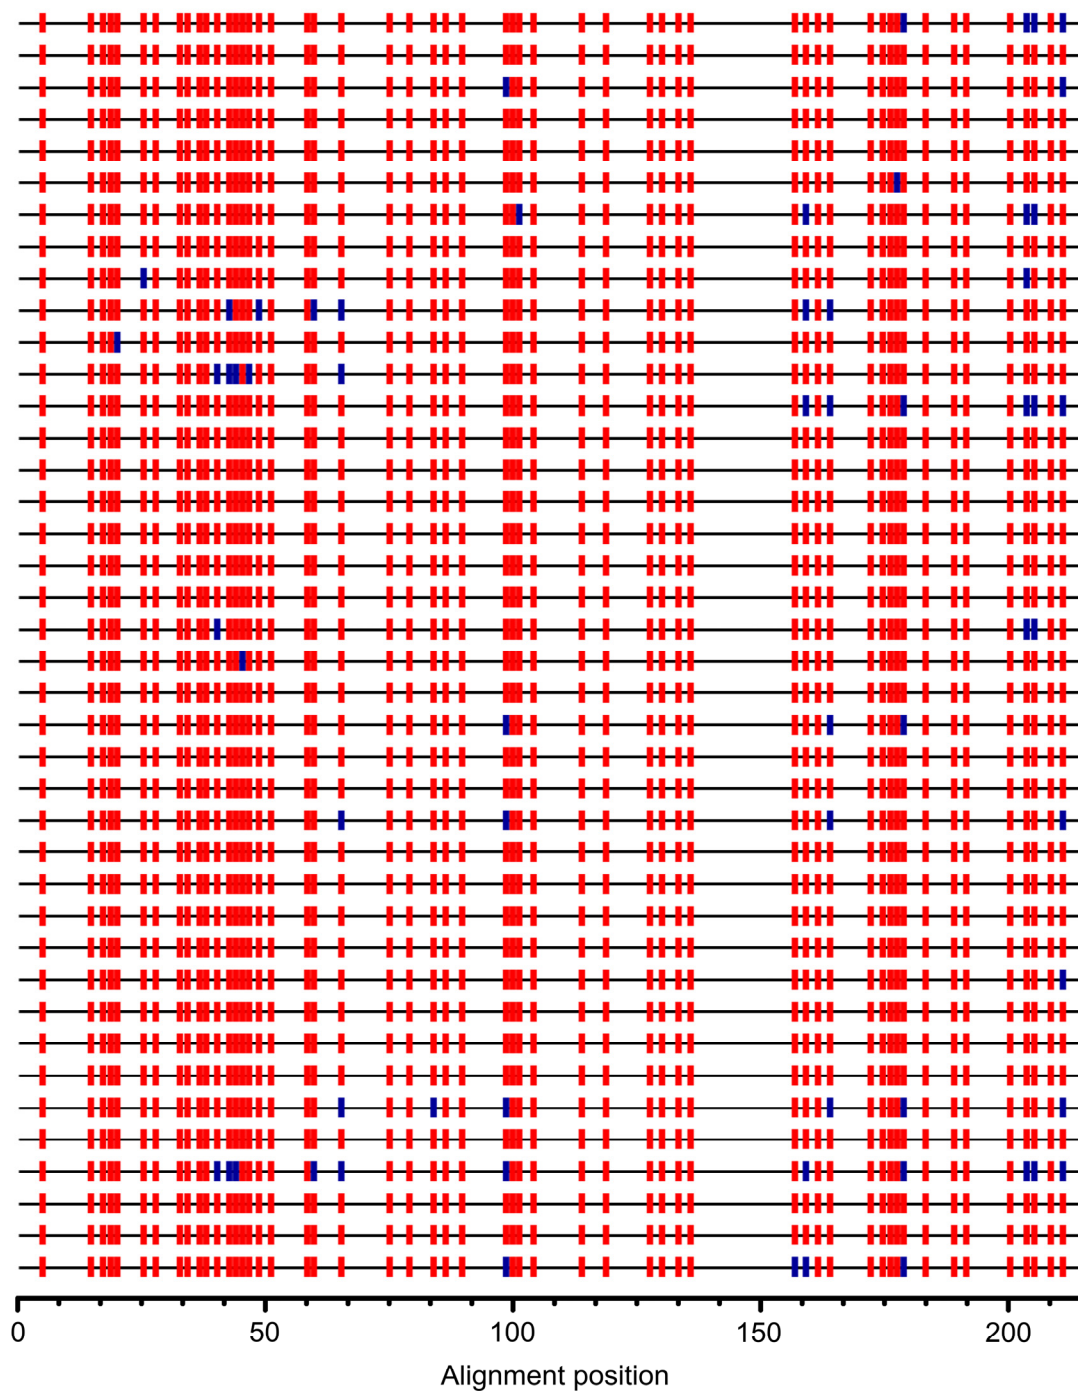

**Figure S9.** Raw data for detection of D<sub>3</sub>-4mdC from *D. radiodurans* DNA with LC-MS/MS analysis. (A-C) Different concentrations of D<sub>3</sub>-methionine was added in the cell culture medium. The MRM detection mode (mass transition of  $m/z$  245.2→129.1) was used for the detection of D<sub>3</sub>-4mdC.

**A** Without D<sub>3</sub>-methionine

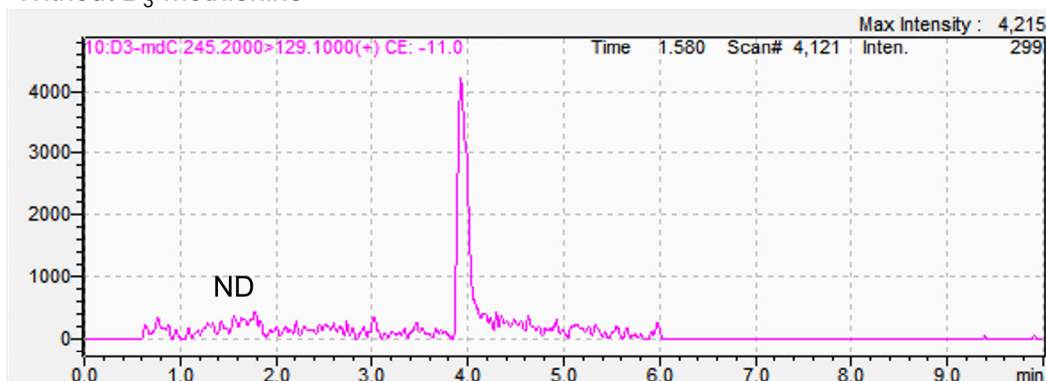

**B** 50 µg/mL D<sub>3</sub>-methionine

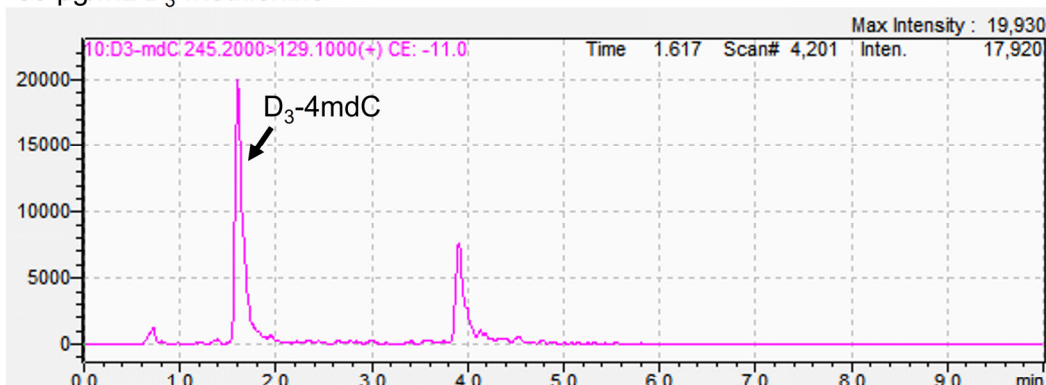

**C** 500 µg/mL D<sub>3</sub>-methionine

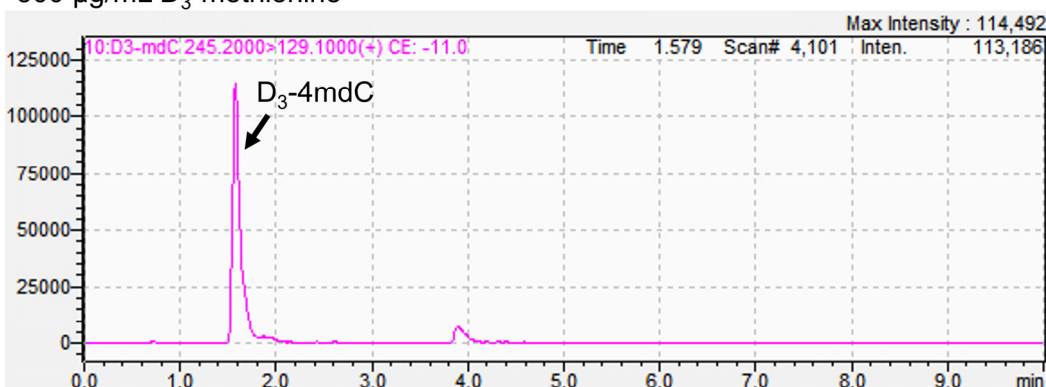

**Figure S10.** Determination of 4mC in *D. radiodurans* DNA by LC-MS/MS. (A, B) Product-ion spectra of 4mdC standard under collision energy of 10 V and 40 V. (C, D) Extracted-ion chromatograms of 4mdC standard with using mass transition of  $m/z$  242.2  $\rightarrow$  126.1 or  $m/z$  242.2  $\rightarrow$  95.1. (E, F) Product-ion spectra of 5mdC standard under collision energy of 10 V and 40 V. (G, H) Extracted-ion chromatograms of 5mdC standard with using mass transition of  $m/z$  242.2  $\rightarrow$  126.1 or  $m/z$  242.2  $\rightarrow$  95.1. (I, J) Product-ion spectra of 4mdC/5mdC from *D. radiodurans* DNA under collision energy of 10 V and 40 V. (K, L) Extracted-ion chromatograms of 4mdC/5mdC from *D. radiodurans* DNA with using mass transition of  $m/z$  242.2  $\rightarrow$  126.1 or  $m/z$  242.2  $\rightarrow$  95.1.

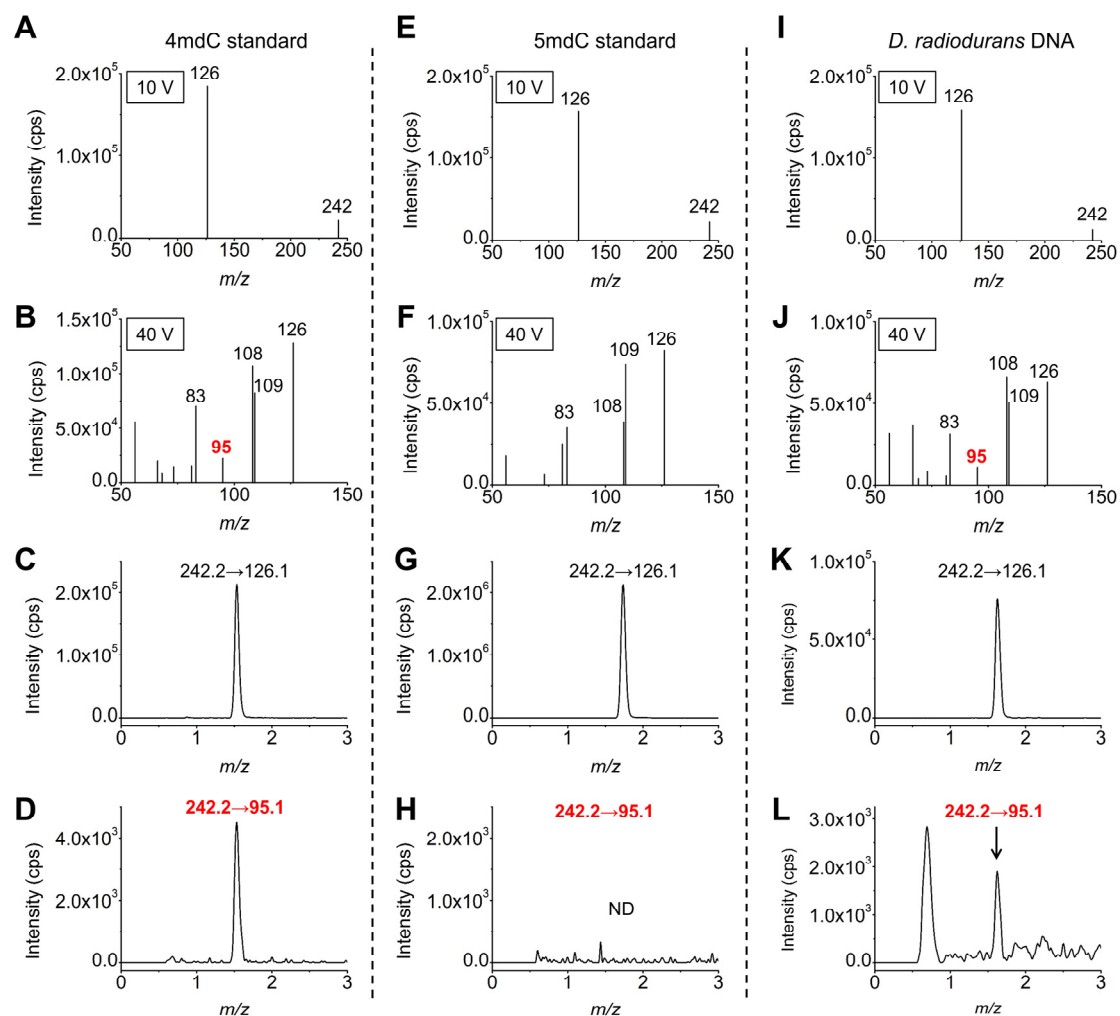

**Figure S11.** Confirmation of 4mC modification in *D. radiodurans* DNA by high-resolution mass spectrometry. (A) Extracted-ion chromatogram ( $m/z$  242.1135) of 4mdC standard. (B–D) MS<sup>1</sup>, MS<sup>2</sup> and MS<sup>3</sup> spectra of 4mdC standard. (E) Extracted-ion chromatogram ( $m/z$  242.1135) of 5mdC standard. (F–H) MS<sup>1</sup>, MS<sup>2</sup> and MS<sup>3</sup> spectra of 5mdC standard. (I) Extracted-ion chromatogram ( $m/z$  242.1135) of digested nucleosides from *D. radiodurans* DNA. (J–L) MS<sup>1</sup>, MS<sup>2</sup> and MS<sup>3</sup> spectra of digested nucleosides from *D. radiodurans* DNA. The fragment ion of  $m/z$  95.0238 is unique in 4mdC standard and in digested nucleosides from *D. radiodurans* DNA, indicating the presence of 4mdC in *D. radiodurans* DNA.

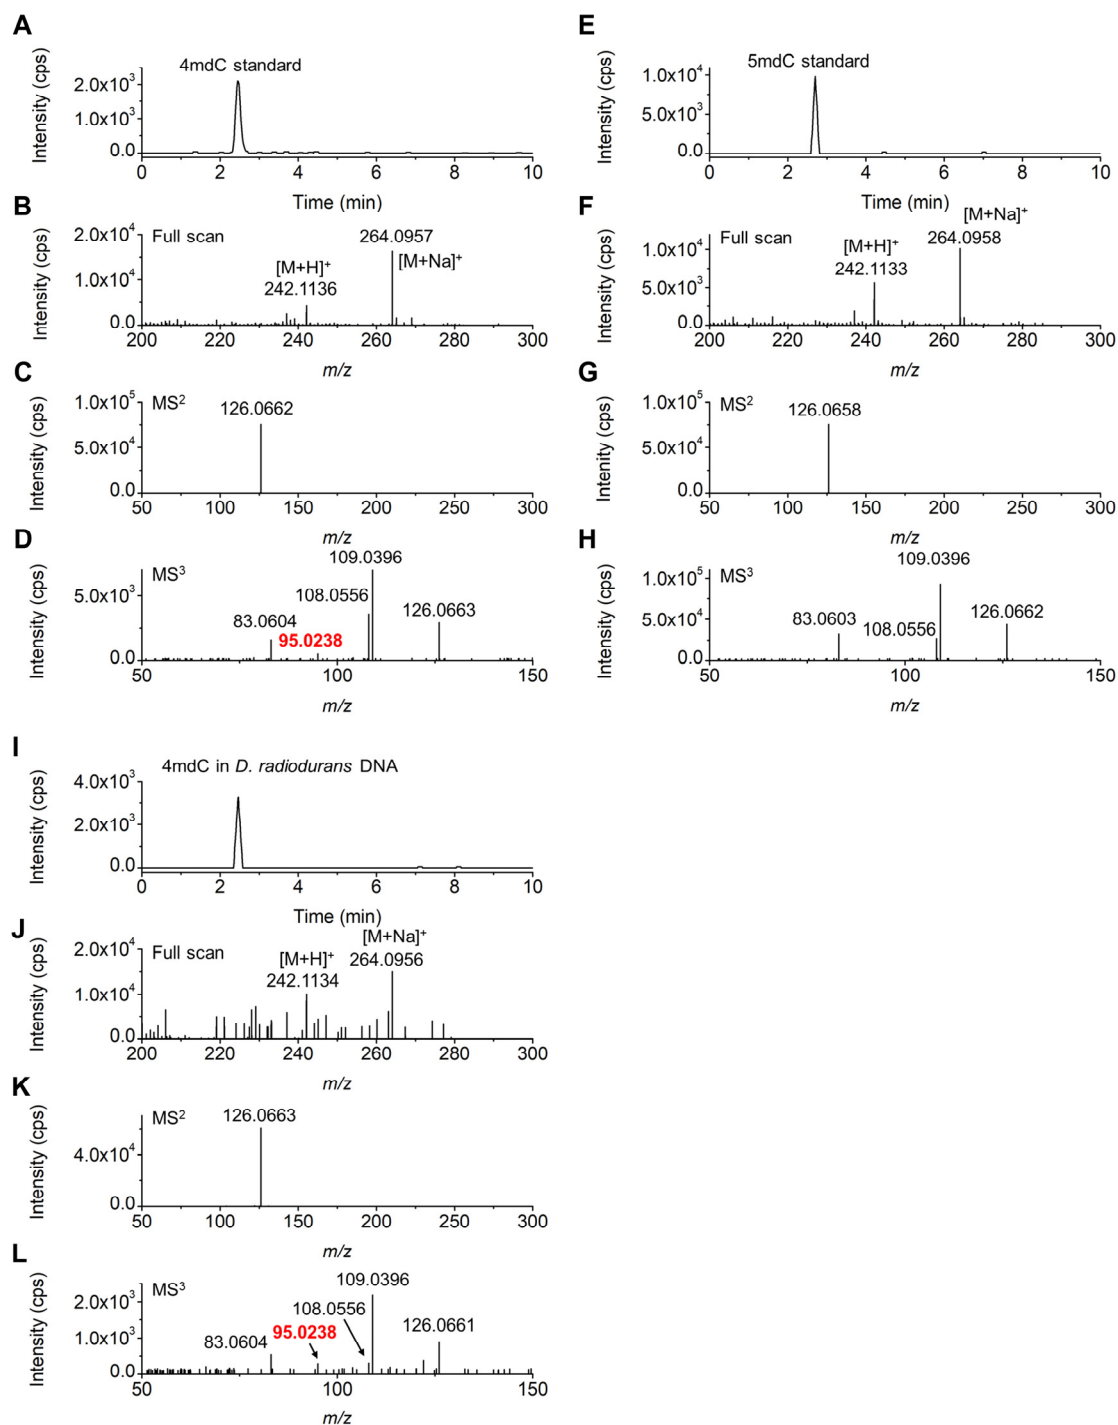

**Figure S12.** The proposed fragmentation pathways of (A) 4mdC and (B) 5mdC.

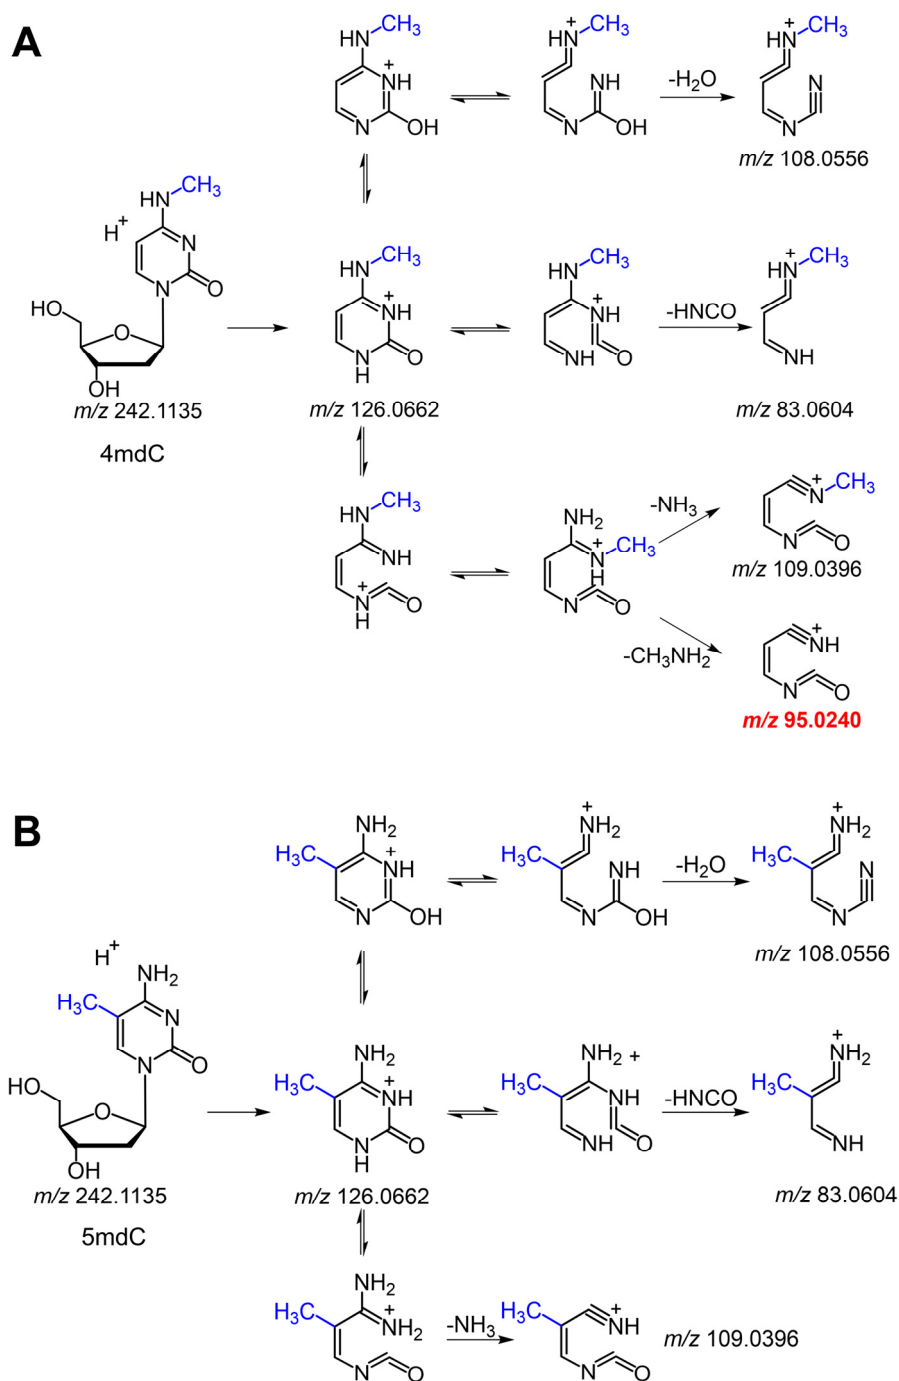



**Figure S13.** Determination of DNA cytosine methylation in *D. radiodurans* DNA by LC-MS/MS. The extracted-ion chromatograms of 3mC, 4mC and 5mC standards and DNA from *E. coli* and *D. radiodurans*. The LC separation was performed using mobile phases of water (solvent A) and methanol (solvent B). A gradient of 0–1.5 min 5% B, 1.5–3 min 5–40% B, 3–6.5 min 40% B, 6.5–7 min 40–5% B, and 7–12 min 5% B was used. Under the optimized conditions, 3mC, 4mC and 5mC were well separated. The results showed that 5mC existed in *E. coli* DNA, but was absent in *D. radiodurans* DNA. However, 4mC existed in *D. radiodurans* DNA, but was absent in *E. coli* DNA. The mobile phases and gradient used in this LC separation were different from those used in the main text (Figures 2 and 5), therefore leading to the different elution and separation resolution of these modified cytosines.

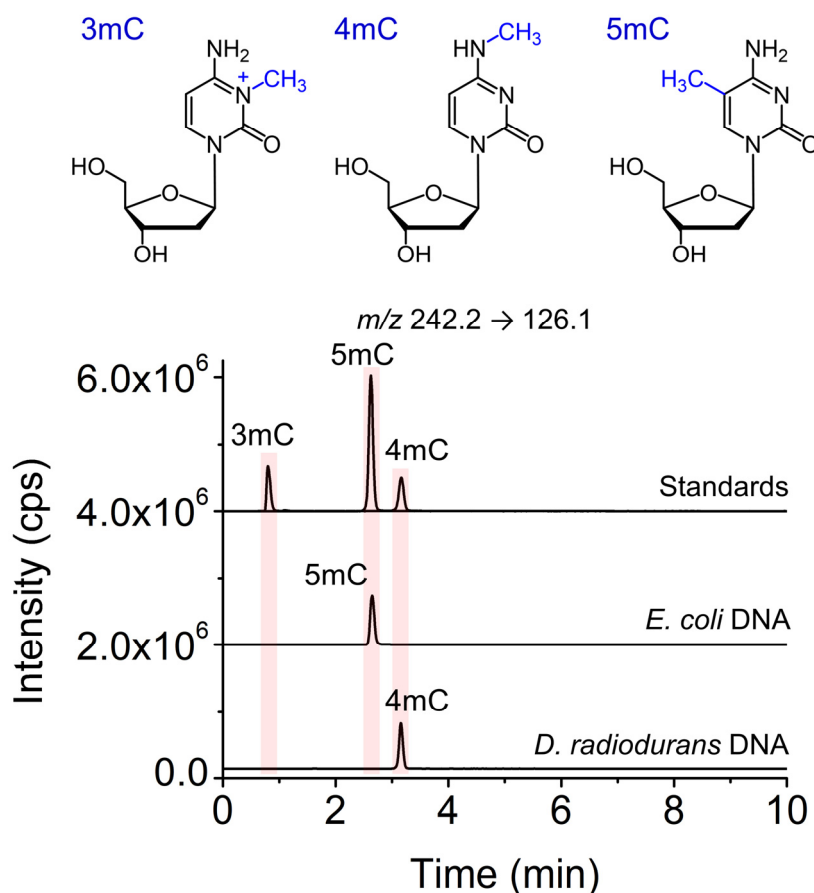

**Figure S14.** Determination of 5hmC (A), 5fC (B), and 5caC (C) in *D. radiodurans* DNA by LC-MS/MS. The mobile phases and gradient used in this LC separation were same as those used in the main text (Figure 2 and 4)

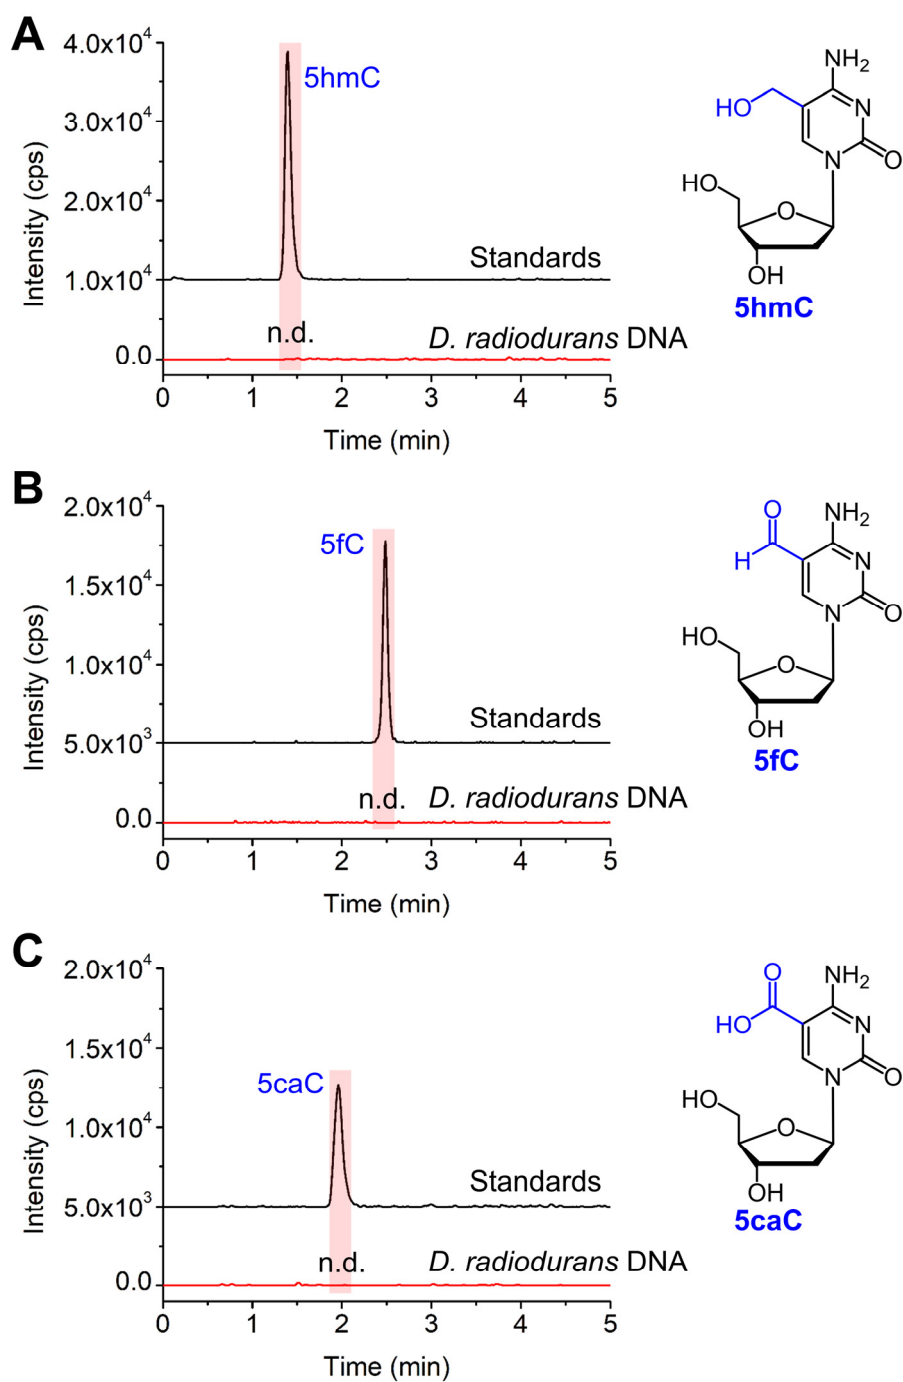

**Figure S15.** Growth curve of *D. radiodurans*.

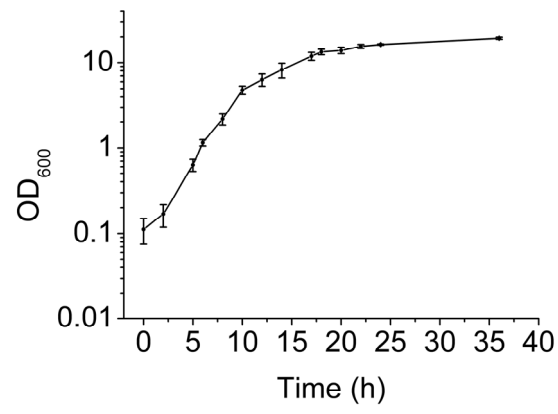

**Figure S16.** Schematic illustration of the library construction for 4mC-AMD-seq.

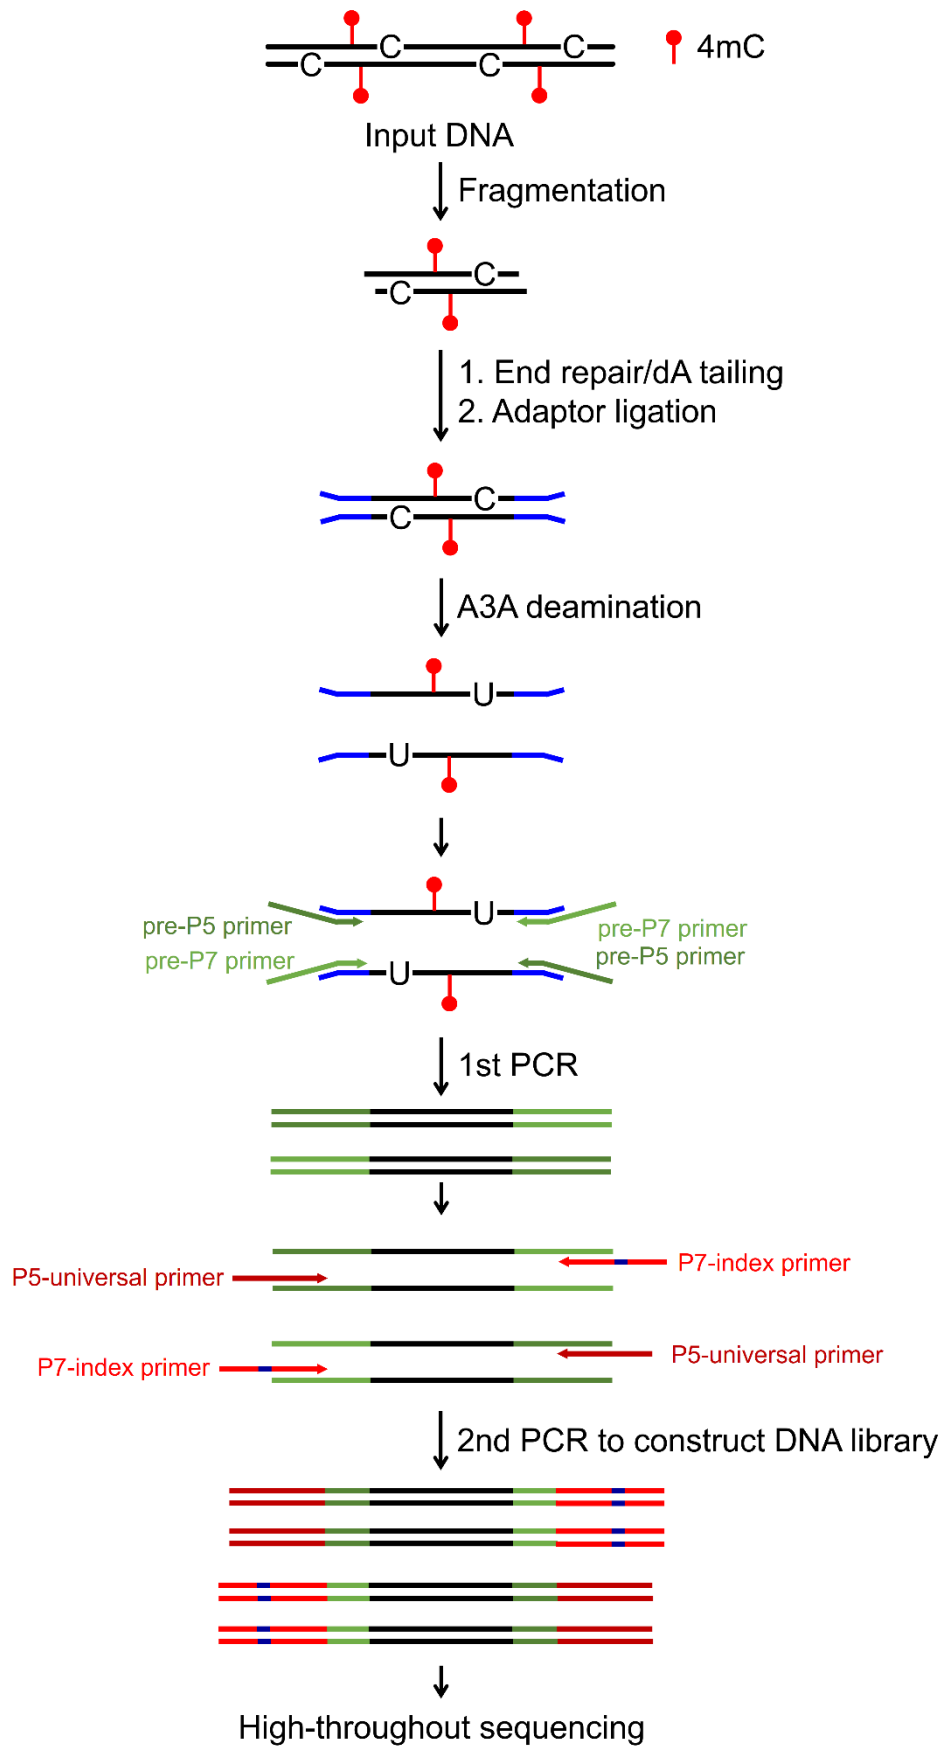

**Figure S17.** Correlation of methylation level of the identified 4mC sites in different replicates (Rep 1, Rep 2, Rep 3). Red, 4mC in C(4mC)GCGG motif; blue, 4mC in non-CCGCGG context. Pearson correlation coefficient (r) was calculated by SPSS version25.

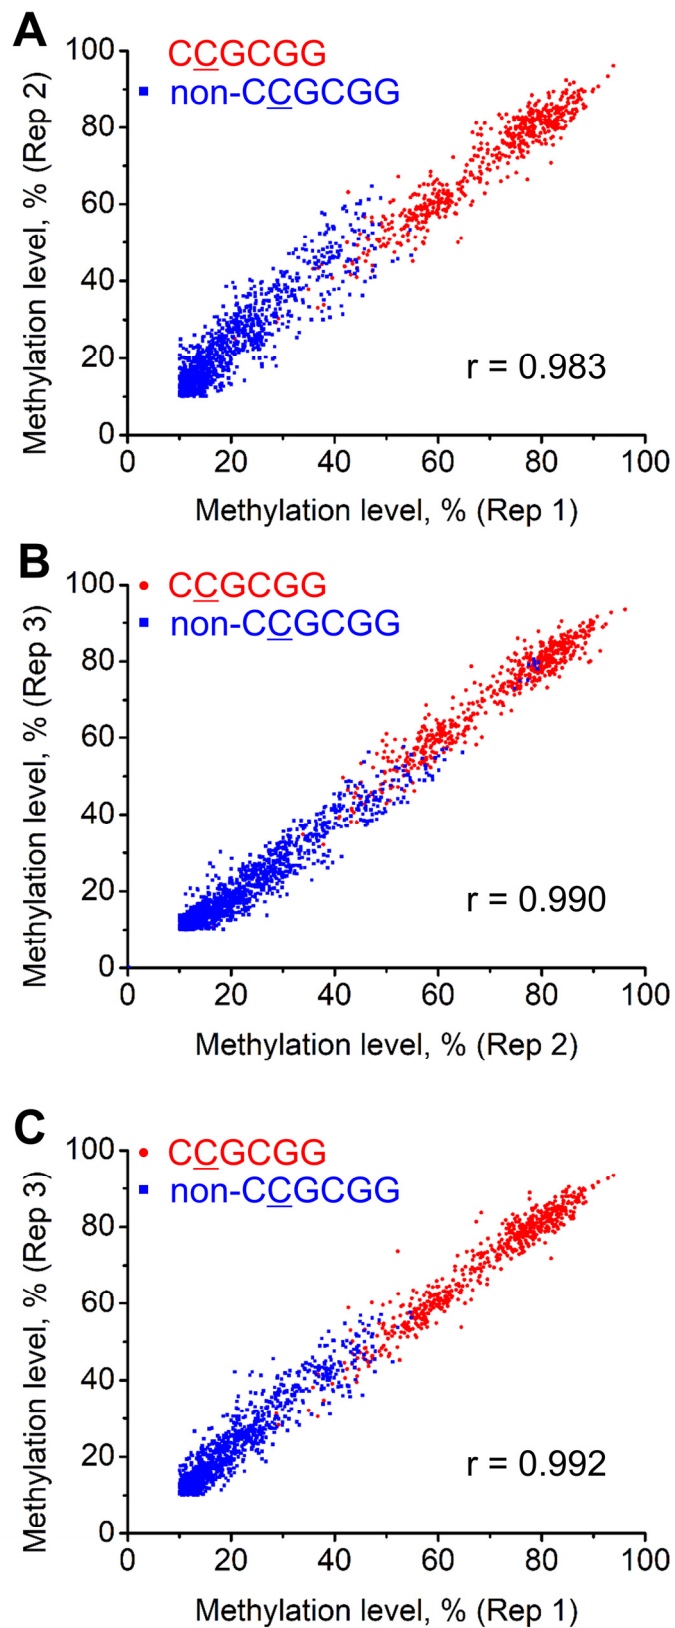

**Figure S18.** Distribution of 4mC sites in the different regions of genes.

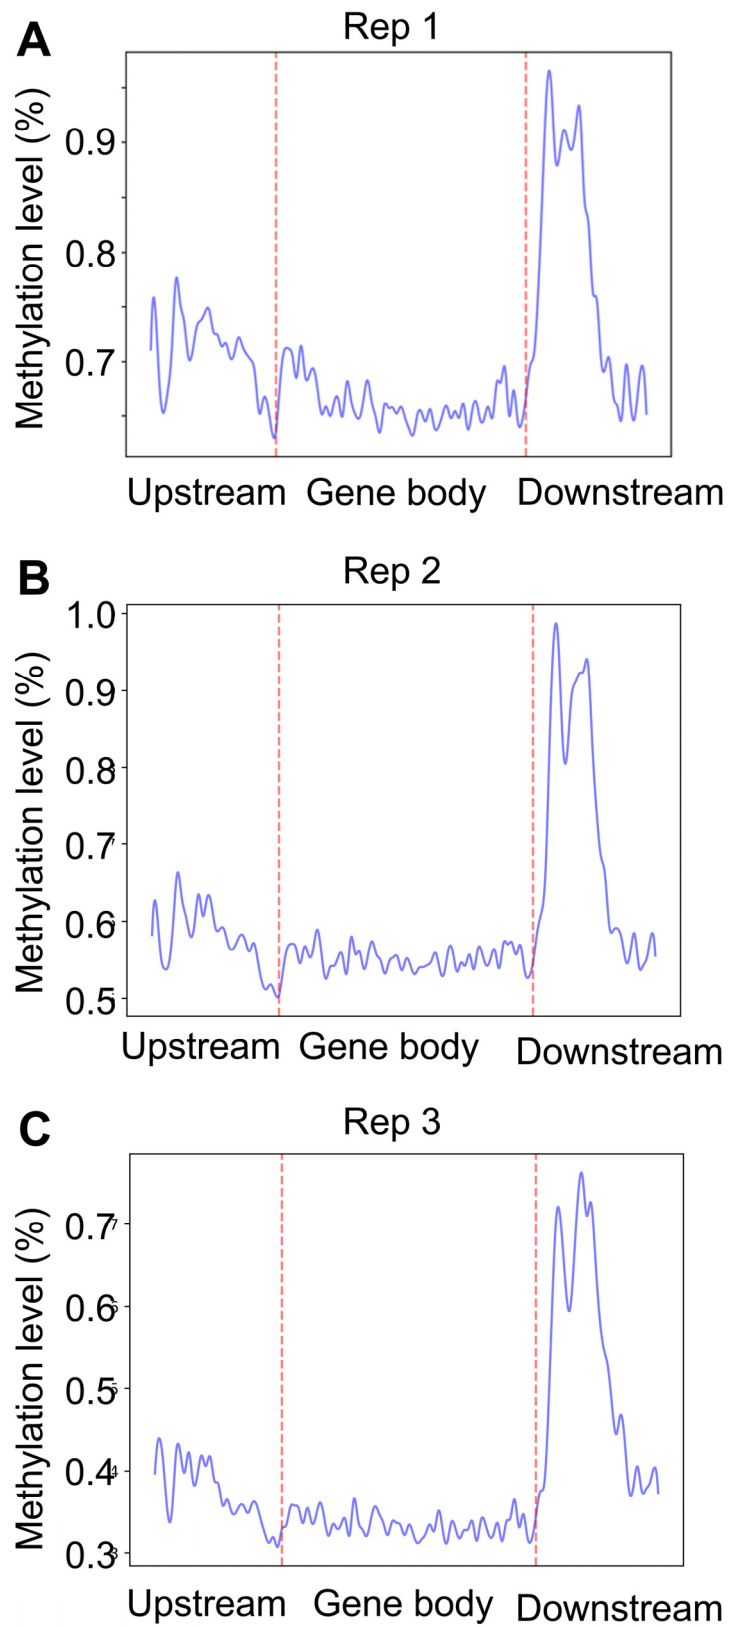

**Figure S19.** Distribution of the methylation level of 4mC site in C(4mC)GCGG motif in different replicates (Rep1, Rep 2, and Rep 3).

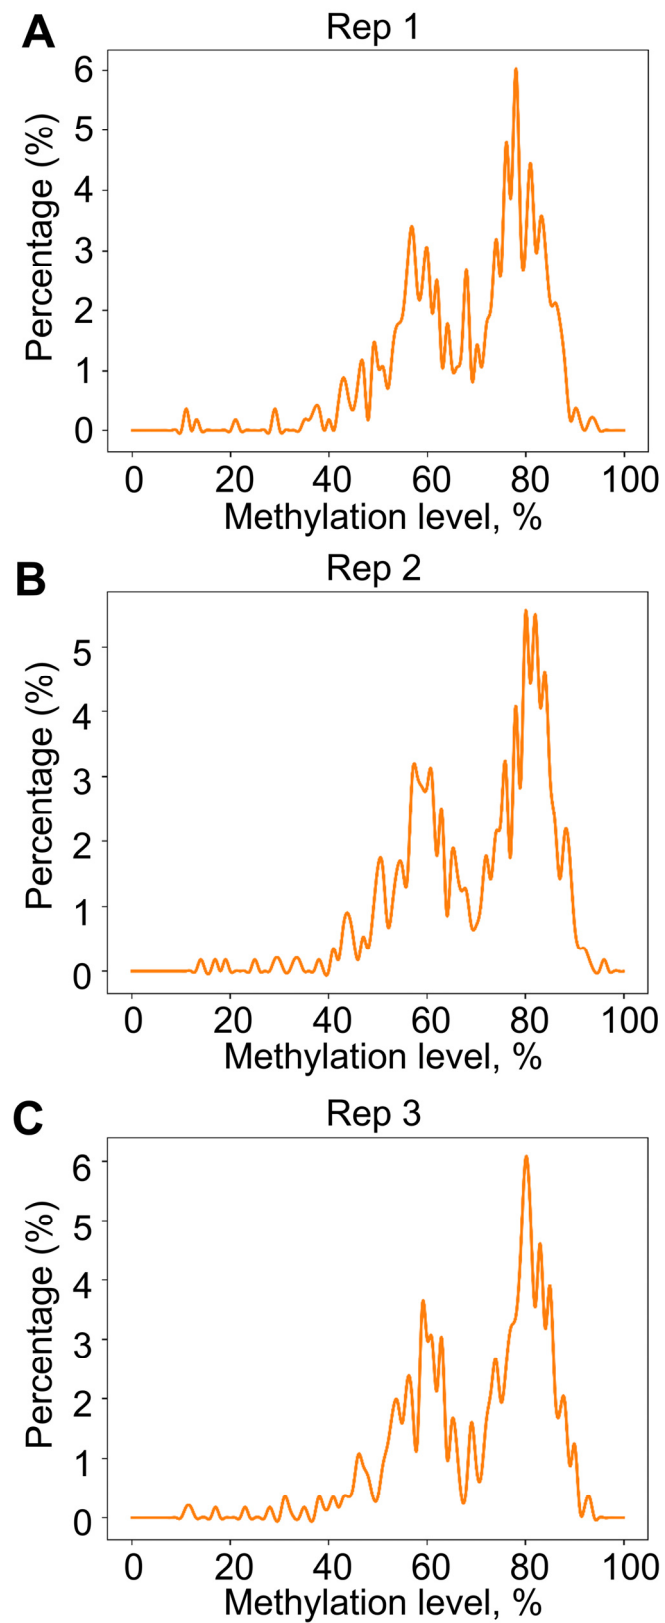

**Figure S20.** Locus-specific analysis of 4mC in seven C(4mC)GCGG motif by Sanger sequencing.

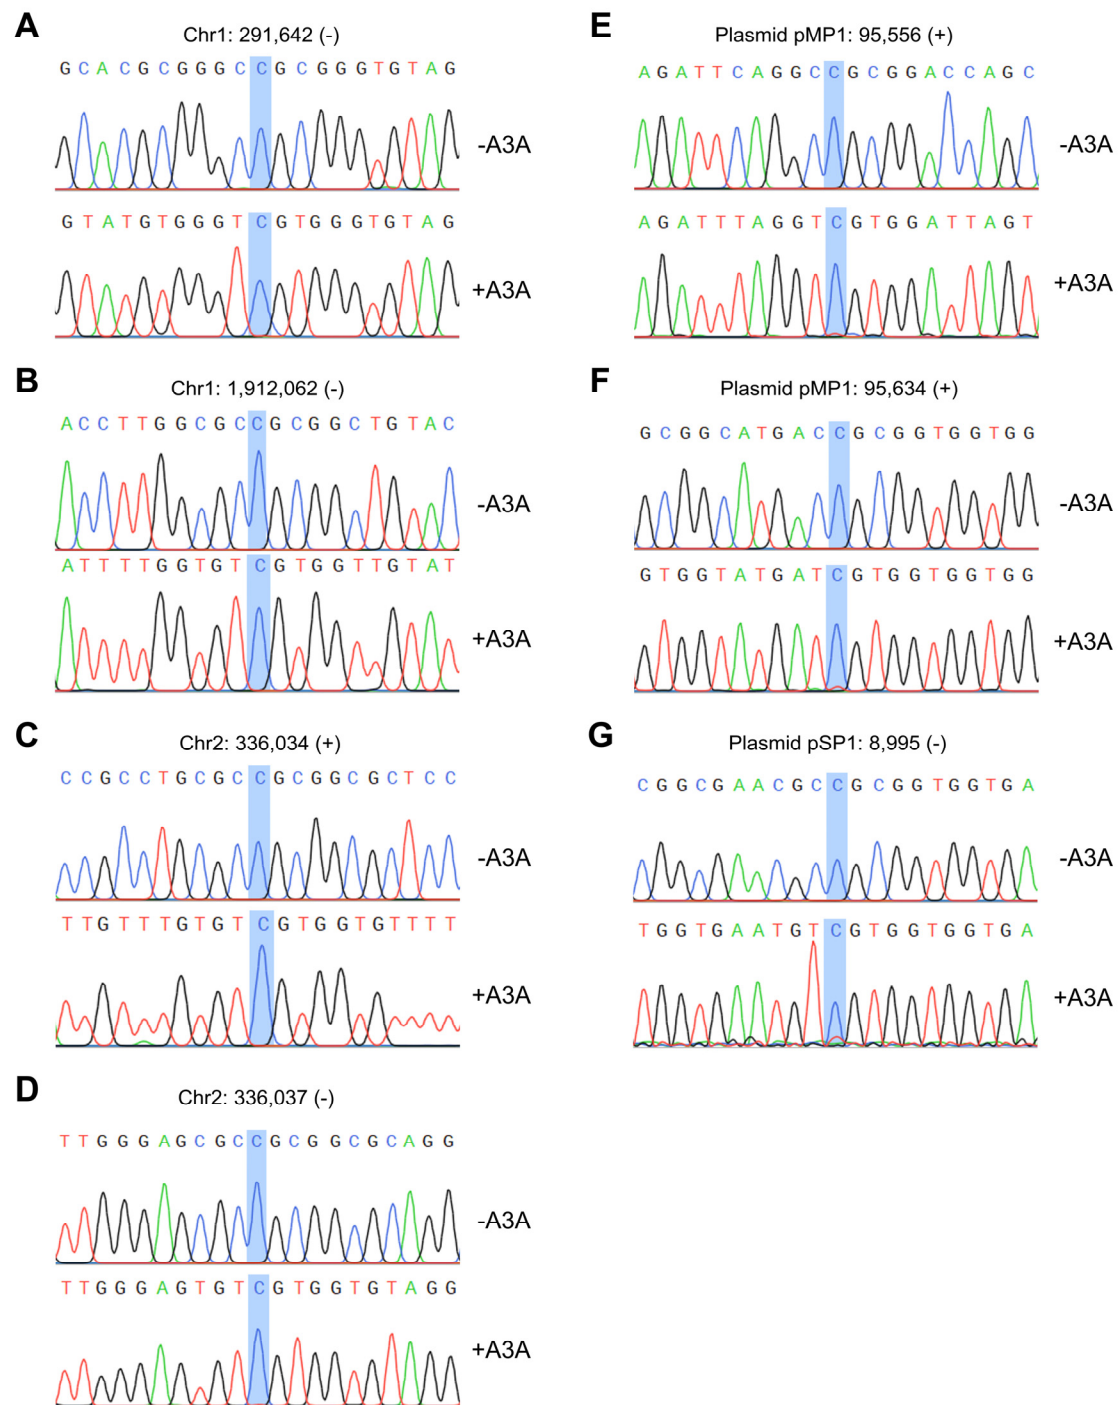



## References

1. M. Y. Cheng, X. J. You, J. H. Ding, Y. Dai, M. Y. Chen, B. F. Yuan and Y. Q. Feng, *Chem Sci*, 2021, **12**, 8149-8156.
2. E. K. Schutsky, C. S. Nabel, A. K. F. Davis, J. E. DeNizio and R. M. Kohli, *Nucleic Acids Res*, 2017, **45**, 7655-7665.
